# Supplementary material for: Direct heptafluoroisopropylation of arylboronic acids via hexafluoropropene (HFP)
Source: Royal Society of Chemistry journal article supplement (doi:10.1039/c5cc07616a), 2015-11-06

## Supporting Information

### Direct Heptafluoroisopropylation of Arylboronic Acids *via* Hexafluoropropene (HFP)

**Yajun Li,<sup>[a],[b]</sup> Xiaojun Wang,<sup>[a],[c]</sup> Yuwei Guo,<sup>[a],[c]</sup> Zhentong Zhu,<sup>[a],[d]</sup>**

**Yongming Wu,<sup>\*[a]</sup> Yuefa Gong<sup>\*[b]</sup>**

<sup>a</sup> Key Laboratory of Organofluorine Chemistry, Shanghai Institute of Organic Chemistry, Chinese Academy of Sciences, 345 Lingling Road, Shanghai 200032, China.

<sup>b</sup> School of Chemistry and Chemical Engineering, Huazhong University of Science and Technology, 1037 Luoyu Road, Wuhan 430074, China.

<sup>c</sup> Department of Chemistry, Shanghai University, 99 Shangda Road, Shanghai 200444, China.

<sup>d</sup> School of Chemical and environmental Engineering, Shanghai Institute of Technology, 100 Haiquan Road, Shanghai 201418, China.

Corresponding author: [ymwu@sioc.ac.cn](mailto:ymwu@sioc.ac.cn);

[gongyf@mail.hust.edu.cn](mailto:gongyf@mail.hust.edu.cn)

## General Information

Melting points were measured on a Melt-Temp apparatus and were uncorrected.  $^1\text{H}$  NMR spectra were recorded in  $\text{CDCl}_3$  on a Bruker AM-300 spectrometer (300 MHz) with TMS as internal standard.  $^{19}\text{F}$  NMR spectra were taken on a Bruker AM-300(282 MHz) spectrometer using  $\text{PhCF}_3$  as external standard.  $^{13}\text{C}$  NMR spectra were taken a Bruker AM-400(100 MHz) spectrometer.  $^1\text{H}$  NMR data are reported as follows: chemical shift, multiplicity (s = singlet, d = doublet, t = triplet, q = quartet, hept = heptet, dd = doublet of doublet, m = multiplet, etc.), integration, and coupling constants (Hz).  $^{13}\text{C}$  NMR data are reported in parts per million (ppm) on the  $\delta$  scale. IR spectra were obtained with a Nicolet AV-360 spectrophotometer. Mass spectra and elemental analyses were recorded in this institute. Solvents were purchased from commercial sources and purified before used by standard procedures. Unless otherwise specified, all reactions were carried out under a nitrogen atmosphere in a flame-dried Schlenk tube and magnetic stirring. TLC analysis was performed on silica gel plates, column chromatography over silica gel (mesh 300-400) and petroleum ethyl acetate combination was used as the eluent.

### General procedure for heptafluoroisopropylation of various arylboronic acid derivatives

**Preparation of heptafluoroisopropyl silver reagent:**<sup>1</sup> to 0.2 mmol of silver fluoride in  $\text{CH}_3\text{CN}$  was added 0.2 mmol of HFP as a gas in 0.5h at rt. When all the solid disappeared, a clean solution was obtained, which was used in the next step directly.

**General procedures for preparation of heptafluoroisopropylated arenes:** after removing solvent of the above solution by evaporation, 2 ml of DMF was added. 5 mins later, 0.2 mmol of  $\text{CuOAc}$  was added, and 0.1 mmol of arylboronic acid and 50 mg of 4Å MS was added successively. Then the mixture was stirred at rt until the reaction was over. Excess amount of ethyl acetate was added to dilute the solution. Filtered, washed with water, dried, and then concentrated to get the crude product. The crude residue was purified by flash column chromatography (combined solvent ethyl acetate and petrol ether as eluent) to afford the pure product.

### 2b, 4-(perfluoropropan-2-yl)-1,1'-biphenyl

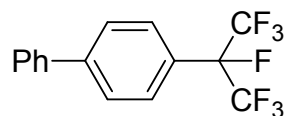

White solid, mp: 89-91 °C;  $^1\text{H}$  NMR (400 MHz,  $\text{CDCl}_3$ )  $\delta$  7.69 (q,  $J = 8.7$  Hz, 4H), 7.64 – 7.56 (m, 2H), 7.47 (m, 2H), 7.41 (m, 1H);  $^{13}\text{C}$  NMR (100 MHz,  $\text{CDCl}_3$ )  $\delta$  144.02, 139.64, 129.01, 128.21, 127.55 (d,  $J = 2.0$  Hz), 127.25, 126.18 (d,  $J = 10.4$  Hz), 125.60 (d,  $J = 20.6$  Hz), 120.75 (qd,  $J = 285.3, 26.4$  Hz), 91.65 (dq,  $J = 201.8, 31.1$  Hz);  $^{19}\text{F}$  NMR (376 MHz,  $\text{CDCl}_3$ )  $\delta$  -75.66 (d,  $J = 7.4$  Hz), -182.49 (hept,  $J = 7.2$  Hz); IR (KBr,  $\text{cm}^{-1}$ ):  $\nu$  3078, 1446, 1280, 1218, 1101, 981, 835, 736, 697; MS (EI)  $m/z$  (relative intensity) 322 [ $\text{M}^+$ ], 253 (100); HRMS (EI) calcd. For  $\text{C}_{15}\text{H}_9\text{F}_7$ : 322.0592, Found: 322.0590.

### 2c, 1-(tert-butyl)-4-(perfluoropropan-2-yl)benzene<sup>2</sup>

<sup>1</sup> W. T. Miller, R. J. Burnard, *J. Am. Chem. Soc.* **1968**, *90*, 7367.

<sup>2</sup> E. E. Gilbert, *J. Org. Chem.*, **1970**, *35*, 850.

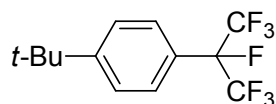

Colourless liquid;  $^1\text{H}$  NMR (400 MHz,  $\text{CDCl}_3$ )  $\delta$  7.59 – 7.46 (m, 4H), 1.34 (s, 9H);  $^{13}\text{C}$  NMR (100 MHz,  $\text{CDCl}_3$ )  $\delta$  154.26, 125.80, 125.39 (d,  $J$  = 10.2 Hz), 123.75 (d,  $J$  = 20.7 Hz), 120.71 (qd,  $J$  = 286.8, 28.5 Hz), 92.90-89.92 (m), 34.76, 31.05;  $^{19}\text{F}$  NMR (376 MHz,  $\text{CDCl}_3$ )  $\delta$  -75.85 (d,  $J$  = 7.3 Hz), -182.59 – -182.76 (m); IR (film,  $\text{cm}^{-1}$ ):  $\nu$  2968, 1611, 1308, 1218, 1100, 982, 832, 711; MS (EI)  $m/z$  (relative intensity) 302 [ $\text{M}^+$ ], 287 (100); HRMS (EI) calcd. For  $\text{C}_{13}\text{H}_{13}\text{F}_7$ : 302.0905, Found: 302.0906.

### 2d, 1-iodo-4-(perfluoropropan-2-yl)benzene<sup>3</sup>

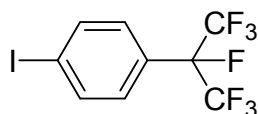

Colourless liquid;  $^1\text{H}$  NMR (400 MHz,  $\text{CDCl}_3$ )  $\delta$  7.86 (d,  $J$  = 8.3 Hz, 2H), 7.33 (d,  $J$  = 8.5 Hz, 2H);  $^{13}\text{C}$  NMR (100 MHz,  $\text{CDCl}_3$ )  $\delta$  138.20, 127.31 (d,  $J$  = 10.5 Hz), 126.47 (d,  $J$  = 20.8 Hz), 120.33 (qd,  $J$  = 287.8, 27.5 Hz), 97.91, 93.72 – 88.83 (m);  $^{19}\text{F}$  NMR (376 MHz,  $\text{CDCl}_3$ )  $\delta$  -75.74 (d,  $J$  = 7.3 Hz), -182.91 (hept,  $J$  = 7.2 Hz); IR (film,  $\text{cm}^{-1}$ ):  $\nu$  2926, 1591, 1491, 1301, 1213, 984, 950, 816, 748; MS (EI)  $m/z$  (relative intensity) 372 (100) [ $\text{M}^+$ ]; HRMS (EI) calcd. For  $\text{C}_9\text{H}_4\text{F}_7\text{I}$ : 371.9246, Found: 371.9250.

### 2e, 1-(4-(perfluoropropan-2-yl)phenyl)ethanone

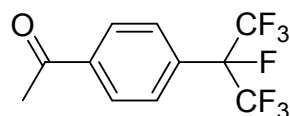

Colourless liquid;  $^1\text{H}$  NMR (400 MHz,  $\text{CDCl}_3$ )  $\delta$  8.09 (d,  $J$  = 8.3 Hz, 2H), 7.74 (d,  $J$  = 8.4 Hz, 2H), 2.65 (s, 3H);  $^{13}\text{C}$  NMR (100 MHz,  $\text{CDCl}_3$ )  $\delta$  196.87, 139.09, 131.07 (d,  $J$  = 20.5 Hz), 128.61 (d,  $J$  = 2.1 Hz), 126.13 (d,  $J$  = 10.6 Hz), 120.36 (qd,  $J$  = 285.8, 28.3 Hz), 93.04-89.70 (m), 26.63;  $^{19}\text{F}$  NMR (376 MHz,  $\text{CDCl}_3$ )  $\delta$  -75.58 (d,  $J$  = 7.3 Hz), -182.66 (hept,  $J$  = 7.1 Hz); IR (film,  $\text{cm}^{-1}$ ):  $\nu$  3372, 3008, 1696, 1613, 1414, 1362, 1273, 1214, 1103, 985, 830, 708; MS (EI)  $m/z$  (relative intensity) 288 [ $\text{M}^+$ ], 273 (100); HRMS (EI) calcd. For  $\text{C}_{11}\text{H}_7\text{OF}_7$ : 288.0385, Found: 288.0388.

### 2f, 4-(perfluoropropan-2-yl)benzonitrile

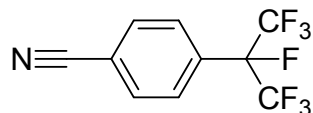

Colourless liquid;  $^1\text{H}$  NMR (400 MHz,  $\text{CDCl}_3$ )  $\delta$  7.83 (d,  $J$  = 8.4 Hz, 2H), 7.77 (d,  $J$  = 8.6 Hz, 2H);  $^{13}\text{C}$  NMR (100 MHz,  $\text{CDCl}_3$ )  $\delta$  132.82 (d,  $J$  = 2.1 Hz), 131.53 (d,  $J$  = 20.8 Hz), 126.86 (d,  $J$  = 10.8 Hz), 120.35 (qd,  $J$  = 285.1, 27.6 Hz), 117.51, 115.76, 92.93 – 89.45 (m);  $^{19}\text{F}$  NMR (376 MHz,  $\text{CDCl}_3$ )  $\delta$  -75.38 (d,  $J$  = 7.3 Hz), -182.69 (hept,  $J$  = 7.2 Hz); IR (film,  $\text{cm}^{-1}$ ):  $\nu$  2911, 1611, 1510, 1497, 1453, 1307, 1277, 1095, 1044, 979, 755; MS (EI)  $m/z$  (relative intensity) 271 (7) [ $\text{M}^+$ ], 221 (100); HRMS (EI) calcd. For  $\text{C}_{10}\text{H}_4\text{NF}_7$ : 271.0232, Found: 271.0230.

<sup>3</sup> K. Kuroda, N. Ishikawa, *Nippon Kagaku Kaishi* **1972**, 10, 1876.

**2g, 1-(perfluoropropan-2-yl)-4-vinylbenzene<sup>4</sup>**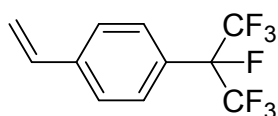

Colourless liquid; <sup>1</sup>H NMR (400 MHz, CDCl<sub>3</sub>) δ 7.57 (d, *J* = 8.5 Hz, 2H), 7.51 (d, *J* = 8.7 Hz, 2H), 6.75 (dd, *J* = 17.6, 10.9 Hz, 1H), 5.85 (dd, *J* = 17.6, 0.5 Hz, 1H), 5.39 (dd, *J* = 10.9, 0.5 Hz, 1H); <sup>13</sup>C NMR (100 MHz, CDCl<sub>3</sub>) δ 140.25, 135.50, 126.55 (d, *J* = 2.1 Hz), 125.92 (d, *J* = 10.5 Hz), 125.70, 120.59 (qd, *J* = 287.2, 27.8 Hz), 116.44, 93.97 – 89.07 (m); <sup>19</sup>F NMR (376 MHz, CDCl<sub>3</sub>) δ -75.74 (d, *J* = 7.3 Hz), -182.54 (hept, *J* = 7.2 Hz); IR (film, cm<sup>-1</sup>): ν 2922, 1513, 1277, 1212, 1103, 983, 750; MS (EI) *m/z* (relative intensity) 272 (45) [M<sup>+</sup>], 203 (100); HRMS (EI) calcd. For C<sub>11</sub>H<sub>7</sub>F<sub>7</sub>: 272.0436, Found: 272.0439.

**2h, 5-(perfluoropropan-2-yl)benzo[d][1,3]dioxole**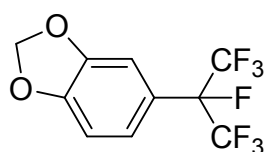

Colourless liquid; <sup>1</sup>H NMR (400 MHz, CDCl<sub>3</sub>) δ 7.11 (d, *J* = 8.3 Hz, 1H), 7.04 (s, 1H), 6.90 (d, *J* = 8.3 Hz, 1H), 6.05 (s, 2H); <sup>13</sup>C NMR (100 MHz, CDCl<sub>3</sub>) δ 149.99, 148.48 (d, *J* = 2.8 Hz), 120.74 (qd, *J* = 284.9, 27.5 Hz), 120.29 (d, *J* = 11.6 Hz), 120.07 (d, *J* = 20.8 Hz), 108.70 (d, *J* = 2.0 Hz), 106.41 (d, *J* = 11.6 Hz), 102.06, 93.20 – 89.88 (m); <sup>19</sup>F NMR (376 MHz, CDCl<sub>3</sub>) δ -75.90 (d, *J* = 7.2 Hz), -180.50 (hept, *J* = 7.1 Hz); IR (film, cm<sup>-1</sup>): ν 2934, 2237, 1508, 1310, 1277, 1212, 986, 836, 749, 705; MS (EI) *m/z* (relative intensity) 290 (13) [M<sup>+</sup>], 193 (100); HRMS (EI) calcd. For C<sub>10</sub>H<sub>5</sub>O<sub>2</sub>F<sub>7</sub>: 290.0178, Found: 290.0176.

**2i, N-(3-(perfluoropropan-2-yl)phenyl)acetamide**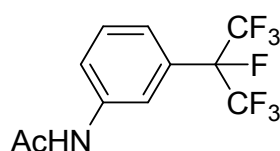

White solid; mp: 78-81 °C; <sup>1</sup>H NMR (400 MHz, CDCl<sub>3</sub>) δ 7.82 (d, *J* = 8.4 Hz, 1H), 7.70 (s, 1H), 7.61 (s, 1H), 7.45 (t, *J* = 8.1 Hz, 1H), 7.34 (d, *J* = 8.0 Hz, 1H), 2.20 (s, 3H); <sup>13</sup>C NMR (100 MHz, CDCl<sub>3</sub>) δ 169.36, 138.76, 129.58, 127.46 (d, *J* = 20.5 Hz), 122.50, 121.24 (d, *J* = 9.9 Hz), 120.50 (qd, *J* = 286.3, 28.2 Hz), 117.07 (d, *J* = 11.7 Hz), 93.83 – 87.74 (m), 24.27; <sup>19</sup>F NMR (376 MHz, CDCl<sub>3</sub>) δ -75.66 (d, *J* = 7.2 Hz), -182.42 (hept, *J* = 7.1 Hz); IR (KBr, cm<sup>-1</sup>): ν 3274, 1673, 1558, 1281, 1224, 982, 750, 727; MS (EI) *m/z* (relative intensity) 303 (21) [M<sup>+</sup>], 261 (100); HRMS (EI) calcd. For C<sub>11</sub>H<sub>8</sub>NOF<sub>7</sub>: 303.0494, Found: 303.0495.

**2j, (4-(perfluoropropan-2-yl)phenyl)methanol**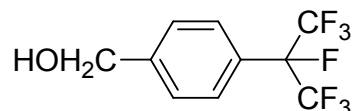

Colourless liquid; <sup>1</sup>H NMR (400 MHz, CDCl<sub>3</sub>) δ 7.61 (d, *J* = 8.3 Hz, 2H), 7.50 (d, *J* = 8.2 Hz, 2H),

<sup>4</sup> B. Boemer, H. Hagemann, *Angewandte Makromolekulare Chemie* **1982**, 109/110, 285.

4.77 (s, 2H), 1.91 (s, 1H);  $^{13}\text{C}$  NMR (100 MHz,  $\text{CDCl}_3$ )  $\delta$  143.97, 128.81, 127.06 (d,  $J = 2.1$  Hz), 125.90 (d,  $J = 10.8$  Hz), 120.59 (qd,  $J = 286.4, 28.1$  Hz), 93.54 – 89.23 (m), 64.40;  $^{19}\text{F}$  NMR (376 MHz,  $\text{CDCl}_3$ )  $\delta$  -75.77 (d,  $J = 7.3$  Hz), -182.57 (hept,  $J = 7.1$  Hz); IR (film,  $\text{cm}^{-1}$ ):  $\nu$  3314, 1276, 1261, 1213, 984, 751; MS (EI)  $m/z$  (relative intensity) 276 (44) [ $\text{M}^+$ ], 107 (100); HRMS (EI) calcd. For  $\text{C}_{10}\text{H}_7\text{OF}_7$ : 276.0385, Found: 276.0388.

#### 2k, 4-(perfluoropropan-2-yl)phenol<sup>5</sup>

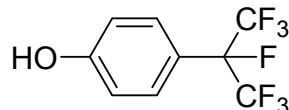

Colourless liquid;  $^1\text{H}$  NMR (400 MHz,  $\text{CDCl}_3$ )  $\delta$  7.48 (d,  $J = 8.8$  Hz, 2H), 6.94 (d,  $J = 8.5$  Hz, 2H);  $^{13}\text{C}$  NMR (100 MHz,  $\text{CDCl}_3$ )  $\delta$  157.68, 127.51 (d,  $J = 10.6$  Hz), 120.66 (qd,  $J = 287.2, 28.3$  Hz), 118.83 (d,  $J = 20.8$  Hz), 115.79 (d,  $J = 1.9$  Hz), 93.30 – 89.70 (m);  $^{19}\text{F}$  NMR (376 MHz,  $\text{CDCl}_3$ )  $\delta$  -76.00 (d,  $J = 7.4$  Hz), -181.75 (hept,  $J = 7.2$  Hz); IR (film,  $\text{cm}^{-1}$ ):  $\nu$  3251, 1519, 1450, 1276, 981, 764, 750; MS (EI)  $m/z$  (relative intensity) 262 (43) [ $\text{M}^+$ ], 193 (100); HRMS (EI) calcd. For  $\text{C}_9\text{H}_5\text{OF}_7$ : 262.0229, Found: 262.0232.

#### 2l, methyl 4-(perfluoropropan-2-yl)benzoate<sup>6</sup>

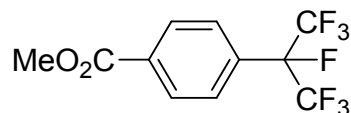

Colourless liquid;  $^1\text{H}$  NMR (400 MHz,  $\text{CDCl}_3$ )  $\delta$  8.17 (d,  $J = 8.3$  Hz, 2H), 7.71 (d,  $J = 8.4$  Hz, 2H), 3.96 (s, 3H);  $^{13}\text{C}$  NMR (100 MHz,  $\text{CDCl}_3$ )  $\delta$  165.81, 132.75, 131.02 (d,  $J = 20.5$  Hz), 129.94 (d,  $J = 2.3$  Hz), 125.83 (d,  $J = 10.7$  Hz), 120.33 (qd,  $J = 287.8, 28.3$  Hz), 93.02 – 89.41 (m), 52.45;  $^{19}\text{F}$  NMR (376 MHz,  $\text{CDCl}_3$ )  $\delta$  -75.55 (d,  $J = 7.0$  Hz), -182.59 (hept,  $J = 7.1$  Hz); IR (film,  $\text{cm}^{-1}$ ):  $\nu$  2958, 1736, 1439, 1279, 1212, 1105, 985, 956, 723; MS (EI)  $m/z$  (relative intensity) 304 (24) [ $\text{M}^+$ ], 273 (100); HRMS (EI) calcd. For  $\text{C}_{11}\text{H}_7\text{O}_2\text{F}_7$ : 304.0334, Found: 304.0333.

#### 2m, 4-(perfluoropropan-2-yl)benzaldehyde<sup>7</sup>

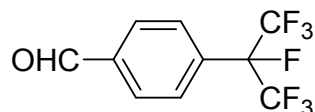

Colourless liquid;  $^1\text{H}$  NMR (400 MHz,  $\text{CDCl}_3$ )  $\delta$  10.10 (s, 1H), 8.02 (d,  $J = 8.2$  Hz, 2H), 7.81 (d,  $J = 8.2$  Hz, 2H);  $^{13}\text{C}$  NMR (100 MHz,  $\text{CDCl}_3$ )  $\delta$  190.93, 138.13, 132.41 (d,  $J = 20.5$  Hz), 129.83, 126.59 (d,  $J = 10.5$  Hz), 120.33 (qd,  $J = 287.6, 27.9$  Hz), 93.34 – 88.47 (m);  $^{19}\text{F}$  NMR (376 MHz,  $\text{CDCl}_3$ )  $\delta$  -75.40 (d,  $J = 7.2$  Hz), -182.33 (hept,  $J = 7.1$  Hz); IR (film,  $\text{cm}^{-1}$ ):  $\nu$  2853, 1709, 1276, 1261, 984, 750; MS (EI)  $m/z$  (relative intensity) 274 [ $\text{M}^+$ ], 273 (100); HRMS (EI) calcd. For  $\text{C}_{10}\text{H}_5\text{OF}_7$ : 274.0229, Found: 274.0228.

#### 2n, 2-(perfluoropropan-2-yl)naphthalene<sup>6</sup>

<sup>5</sup> T. Umemoto, S. Furukawa, O. Miyano, S. Nakayama, *Nippon Kagaku Kaishi* **1985**, 2146.

<sup>6</sup> N. Ishikawa, M. Ochiai, *Nippon Kagaku Kaishi* **1973**, 2351.

<sup>7</sup> A. Conte, H. Kuehne, T. Luebbbers, P. Mattei, C. Maugeais, W. Mueller, P. Pflieger, PCT Int. Appl. WO 2007090752 A1, 2007.

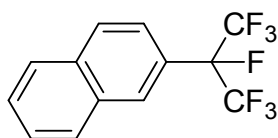

White solid, mp: 65-66 °C;  $^1\text{H}$  NMR (400 MHz,  $\text{CDCl}_3$ )  $\delta$  8.14 (s, 1H), 8.07 – 7.82 (m, 3H), 7.74 – 7.51 (m, 3H);  $^{13}\text{C}$  NMR (100 MHz,  $\text{CDCl}_3$ )  $\delta$  133.99, 132.44 (d,  $J = 2.1$  Hz), 128.85 (d,  $J = 2.3$  Hz), 128.71, 127.96, 127.67, 127.13, 126.44 (d,  $J = 11.9$  Hz), 123.96 (d,  $J = 20.3$  Hz), 121.56 (d,  $J = 9.4$  Hz), 120.70 (qd,  $J = 287.4, 27.8$  Hz), 94.09 – 88.83 (m);  $^{19}\text{F}$  NMR (376 MHz,  $\text{CDCl}_3$ )  $\delta$  -75.43 (d,  $J = 7.3$  Hz), -181.92 (hept,  $J = 7.2$  Hz); IR (KBr,  $\text{cm}^{-1}$ ):  $\nu$  3060, 1276, 1220, 981, 907, 751; MS (EI)  $m/z$  (relative intensity) 296 (71) [ $\text{M}^+$ ], 177 (100); HRMS (EI) calcd. For  $\text{C}_{13}\text{H}_7\text{F}_7$ : 296.0436, Found: 296.0431.

**2p, 1-nitro-4-(perfluoropropan-2-yl)benzene<sup>8</sup>**

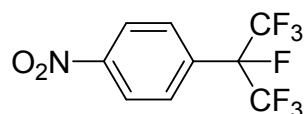

Colourless liquid;  $^1\text{H}$  NMR (400 MHz,  $\text{CDCl}_3$ )  $\delta$  8.38 (d,  $J = 8.7$  Hz, 2H), 7.85 (d,  $J = 8.8$  Hz, 2H);  $^{13}\text{C}$  NMR (100 MHz,  $\text{CDCl}_3$ )  $\delta$  149.61, 132.91 (d,  $J = 20.7$  Hz), 127.22 (d,  $J = 10.8$  Hz), 124.01 (d,  $J = 2.2$  Hz), 120.12 (qd,  $J = 286.9, 27.2$  Hz), 93.28 – 89.60 (m);  $^{19}\text{F}$  NMR (376 MHz,  $\text{CDCl}_3$ )  $\delta$  -75.36 (d,  $J = 7.3$  Hz), -181.96 (hept,  $J = 7.2$  Hz); IR (film,  $\text{cm}^{-1}$ ):  $\nu$  3118, 1611, 1536, 1276, 1217, 1106, 986, 854, 760; MS (EI)  $m/z$  (relative intensity) 291 [ $\text{M}^+$ ], 145 (100); HRMS (EI) calcd. For  $\text{C}_9\text{H}_4\text{NO}_2\text{F}_7$ : 291.0130, Found: 291.0133.

**2q, 1,2,3-trimethoxy-5-(perfluoropropan-2-yl)benzene**

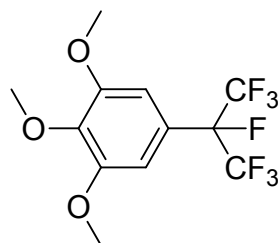

Colourless liquid;  $^1\text{H}$  NMR (400 MHz,  $\text{CDCl}_3$ )  $\delta$  6.79 (s, 2H), 3.90 (s, 3H), 3.89 (s, 6H);  $^{13}\text{C}$  NMR (100 MHz,  $\text{CDCl}_3$ )  $\delta$  153.45 (d,  $J = 2.1$  Hz), 140.12, 121.57 (d,  $J = 20.7$  Hz), 120.52 (qd,  $J = 286.9, 27.9$  Hz), 103.09 (d,  $J = 11.4$  Hz), 93.77 – 89.17 (m), 60.78, 56.20;  $^{19}\text{F}$  NMR (376 MHz,  $\text{CDCl}_3$ )  $\delta$  -75.68 (d,  $J = 7.2$  Hz), -181.23 (hept,  $J = 7.1$  Hz); IR (film,  $\text{cm}^{-1}$ ):  $\nu$  2945, 1595, 1514, 1465, 1422, 1290, 1168, 980, 835, 727; MS (EI)  $m/z$  (relative intensity) 336 (100) [ $\text{M}^+$ ]; HRMS (EI) calcd. For  $\text{C}_{12}\text{H}_{11}\text{O}_3\text{F}_7$ : 336.0596, Found: 336.0593.

**2r, ethyl 3-(perfluoropropan-2-yl)benzoate**

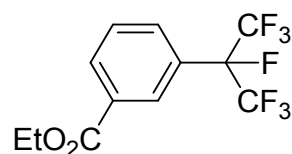

Colourless liquid;  $^1\text{H}$  NMR (400 MHz,  $\text{CDCl}_3$ )  $\delta$  8.31 (s, 1H), 8.23 (d,  $J = 7.9$  Hz, 1H), 7.80 (d,  $J$

<sup>8</sup> W. A. Sheppard, *J. Am. Chem. Soc.* **1965**, 87, 2410.

= 7.9 Hz, 1H), 7.60 (t,  $J = 7.9$  Hz, 1H), 4.43 (q,  $J = 7.1$  Hz, 2H), 1.42 (t,  $J = 7.1$  Hz, 3H);  $^{13}\text{C}$  NMR (100 MHz,  $\text{CDCl}_3$ )  $\delta$  165.26, 132.05, 131.52 (d,  $J = 2.2$  Hz), 129.67 (d,  $J = 10.1$  Hz), 129.06 (d,  $J = 2.2$  Hz), 127.25 (d,  $J = 20.8$  Hz), 126.87 (d,  $J = 11.5$  Hz), 120.40 (qd,  $J = 286.4$ , 28.0 Hz), 93.04 – 89.25 (m), 61.53, 14.19;  $^{19}\text{F}$  NMR (376 MHz,  $\text{CDCl}_3$ )  $\delta$  -75.67 (d,  $J = 7.3$  Hz), -182.48 (hept,  $J = 7.2$  Hz); IR (film,  $\text{cm}^{-1}$ ):  $\nu$  2986, 1728, 1281, 1206, 984, 723; MS (EI)  $m/z$  (relative intensity) 318 (15) [ $\text{M}^+$ ], 273 (100); HRMS (EI) calcd. For  $\text{C}_{12}\text{H}_9\text{O}_2\text{F}_7$ : 318.0491, Found: 318.0494.

### 2s, 2-methoxy-6-(perfluoropropan-2-yl)naphthalene

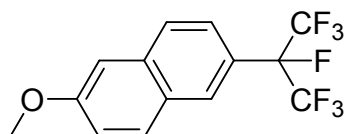

White solid, mp: 53-55 °C;  $^1\text{H}$  NMR (400 MHz,  $\text{CDCl}_3$ )  $\delta$  8.04 (s, 1H), 7.84 (d,  $J = 8.3$  Hz, 1H), 7.81 (d,  $J = 8.7$  Hz, 1H), 7.59 (d,  $J = 8.8$  Hz, 1H), 7.32 – 7.20 (m, 1H), 7.17 (d,  $J = 2.3$  Hz, 1H), 3.94 (s, 3H);  $^{13}\text{C}$  NMR (100 MHz,  $\text{CDCl}_3$ )  $\delta$  159.22, 135.51, 130.19, 127.95 (d,  $J = 2.2$  Hz), 127.55 (d,  $J = 2.3$  Hz), 126.09 (d,  $J = 11.8$  Hz), 122.16 (d,  $J = 9.4$  Hz), 121.53 (d,  $J = 20.5$  Hz), 120.40 (qd,  $J = 285.4$ , 28.0 Hz), 120.15, 105.39, 93.64 – 89.22 (m), 55.33;  $^{19}\text{F}$  NMR (376 MHz,  $\text{CDCl}_3$ )  $\delta$  -75.74 (d,  $J = 7.2$  Hz), -182.51 (hept,  $J = 7.2$  Hz); IR (KBr,  $\text{cm}^{-1}$ ):  $\nu$  2962, 1637, 1610, 1488, 1277, 1220, 1102, 981, 900, 854, 724; MS (EI)  $m/z$  (relative intensity) 326 (53) [ $\text{M}^+$ ], 257 (100); HRMS (EI) calcd. For  $\text{C}_{14}\text{H}_9\text{OF}_7$ : 326.0542, Found: 326.0541.

### 2u, (E)-(3,4,4,4-tetrafluoro-3-(trifluoromethyl)but-1-en-1-yl)benzene<sup>9</sup>

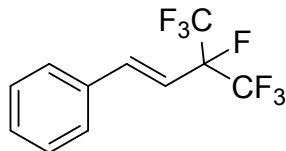

Colourless liquid;  $^1\text{H}$  NMR (400 MHz,  $\text{CDCl}_3$ )  $\delta$  7.48-7.46 (m, 2H), 7.44 – 7.35 (m, 3H), 7.14 (d,  $J = 16.1$  Hz, 1H), 6.14 (dd,  $J = 20.1$ , 16.1 Hz, 1H);  $^{13}\text{C}$  NMR (100 MHz,  $\text{CDCl}_3$ )  $\delta$  138.53 (d,  $J = 10.8$  Hz), 133.87, 129.85, 128.94, 127.37, 125.43 – 115.31 (m), 120.39 (qd,  $J = 287.0$ , 27.5 Hz), 92.78 – 88.83 (m);  $^{19}\text{F}$  NMR (376 MHz,  $\text{CDCl}_3$ )  $\delta$  -77.10 (d,  $J = 7.7$  Hz), -186.02 – -186.28 (m); IR (film,  $\text{cm}^{-1}$ ):  $\nu$  3003, 1275, 1261, 764, 750; MS (EI)  $m/z$  (relative intensity) 272 (73) [ $\text{M}^+$ ], 203 (100); HRMS (EI) calcd. For  $\text{C}_{11}\text{H}_7\text{F}_7$ : 272.0436, Found: 272.0434.

### 2v, 2-(perfluoropropan-2-yl)dibenzo[b,d]thiophene

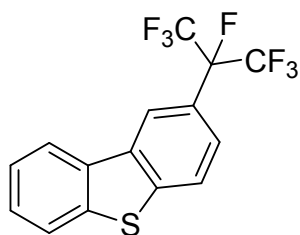

White solid, mp: 102-103 °C;  $^1\text{H}$  NMR (400 MHz,  $\text{CDCl}_3$ )  $\delta$  8.39 (s, 1H), 8.29 – 8.17 (m, 1H), 7.98 (d,  $J = 8.6$  Hz, 1H), 7.93 – 7.83 (m, 1H), 7.67 (d,  $J = 8.5$  Hz, 1H), 7.62 – 7.47 (m, 2H);  $^{13}\text{C}$

<sup>9</sup> T. Kitazume, N. Ishikawa, *J. Am. Chem. Soc.* **1985**, *107*, 5186.

NMR (100 MHz, CDCl<sub>3</sub>)  $\delta$  142.30, 139.84, 135.85 (d,  $J$  = 2.3 Hz), 134.66, 127.61, 124.84, 123.34 (d,  $J$  = 2.2 Hz), 123.19 (d,  $J$  = 9.9 Hz), 122.96 (d,  $J$  = 20.5 Hz), 122.90, 120.70 (qd,  $J$  = 288.7, 27.8 Hz); 121.84, 119.03 (d,  $J$  = 12.1 Hz), 93.63 – 89.89 (m); <sup>19</sup>F NMR (376 MHz, CDCl<sub>3</sub>)  $\delta$  -75.54 (d,  $J$  = 7.3 Hz), -181.49 (hept,  $J$  = 7.2 Hz); IR (KBr, cm<sup>-1</sup>):  $\nu$  3066, 1945, 1899, 1470, 1280, 1221, 1104, 980, 765, 729; MS (EI)  $m/z$  (relative intensity) 352 (77) [M<sup>+</sup>], 233 (100); HRMS (EI) calcd. For C<sub>15</sub>H<sub>7</sub>SF<sub>7</sub>: 352.0157, Found: 352.0161.

### 2w, 5-(perfluoropropan-2-yl)-1H-indole

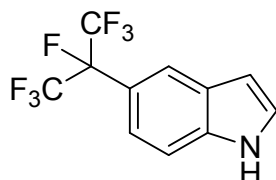

White solid, mp: 100-101 °C; <sup>1</sup>H NMR (400 MHz, CDCl<sub>3</sub>)  $\delta$  8.31 (b, 1H), 7.93 (s, 1H), 7.48 (d,  $J$  = 8.8 Hz, 1H), 7.41 (d,  $J$  = 8.7 Hz, 1H), 7.36 – 7.28 (m, 1H), 6.64 (d,  $J$  = 2.2 Hz, 1H); <sup>13</sup>C NMR (100 MHz, CDCl<sub>3</sub>)  $\delta$  136.63, 127.67 (d,  $J$  = 2.3 Hz), 125.74, 120.98 (qd,  $J$  = 286.9, 27.9 Hz), 118.96 (d,  $J$  = 8.1 Hz), 118.85 (d,  $J$  = 6.7 Hz), 117.96 (d,  $J$  = 20.2 Hz), 111.39 (d,  $J$  = 2.3 Hz), 103.46, 93.98 – 89.99 (m); <sup>19</sup>F NMR (376 MHz, CDCl<sub>3</sub>)  $\delta$  -75.70 (d,  $J$  = 7.2 Hz), -180.53 (hept,  $J$  = 7.1 Hz); IR (KBr, cm<sup>-1</sup>):  $\nu$  3476, 3388, 2248, 1476, 1280, 1216, 1097, 978, 909, 733; MS (EI)  $m/z$  (relative intensity) 285 (48) [M<sup>+</sup>], 216 (100); HRMS (EI) calcd. For C<sub>11</sub>H<sub>6</sub>NF<sub>7</sub>: 285.0388, Found: 285.0392.

### 2x, 2-bromo-5-(perfluoropropan-2-yl)pyridine

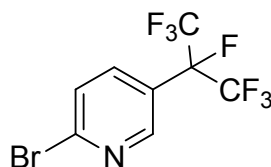

Colourless liquid; <sup>1</sup>H NMR (400 MHz, CDCl<sub>3</sub>)  $\delta$  8.63 (d,  $J$  = 2.2 Hz, 1H), 7.78 (dd,  $J$  = 8.5, 2.4 Hz, 1H), 7.68 (d,  $J$  = 8.5 Hz, 1H); <sup>13</sup>C NMR (100 MHz, CDCl<sub>3</sub>)  $\delta$  148.43 – 146.59 (m), 145.61 (d,  $J$  = 1.1 Hz), 135.69 (d,  $J$  = 9.9 Hz), 128.34 (d,  $J$  = 2.3 Hz), 122.53 (d,  $J$  = 20.9 Hz), 120.02 (qd,  $J$  = 287.3, 27.5 Hz), 93.15 – 87.51 (m); <sup>19</sup>F NMR (376 MHz, CDCl<sub>3</sub>)  $\delta$  -75.91 (d,  $J$  = 7.7 Hz), -184.73 (hept,  $J$  = 7.6 Hz); IR (KBr, cm<sup>-1</sup>):  $\nu$  3072, 2922, 1584, 1466, 1381, 1306, 1278, 1220, 1093, 988, 950, 831, 743, 715; MS (EI)  $m/z$  (relative intensity) 325 (100, <sup>79</sup>Br) [M<sup>+</sup>], 327 (97, <sup>81</sup>Br) [M<sup>+</sup>]; HRMS (EI) calcd. For C<sub>8</sub>H<sub>3</sub>F<sub>7</sub>NBr: 324.9337, Found: 324.9341.

### 2y, tert-butyl (2-methyl-4-(perfluoropropan-2-yl)phenyl)carbamate

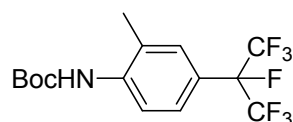

<sup>1</sup>H NMR (400 MHz, CDCl<sub>3</sub>)  $\delta$  8.00 (d,  $J$  = 8.7 Hz, 1H), 7.34 (d,  $J$  = 8.9 Hz, 1H), 7.28 (s, 1H), 6.35 (s, 1H), 2.22 (s, 3H), 1.46 (s, 9H); <sup>13</sup>C NMR (100 MHz, CDCl<sub>3</sub>)  $\delta$  152.47, 139.07, 127.38 (d,  $J$  = 10.8 Hz), 126.33 (d,  $J$  = 1.8 Hz), 126.90 – 114.82 (m), 124.44 (d,  $J$  = 10.3 Hz), 120.67 (d,  $J$  =



20.7 Hz), 120.60 (qd,  $J = 287.9, 27.3$  Hz), 119.57, 93.54 – 88.21 (m), 81.19, 28.21, 17.82;  $^{19}\text{F}$  NMR (376 MHz,  $\text{CDCl}_3$ )  $\delta$  -75.86 (d,  $J = 7.4$  Hz), -182.36 (hept,  $J = 7.3$  Hz); IR (KBr,  $\text{cm}^{-1}$ ):  $\nu$  3275, 2976, 1719, 1694, 1593, 1538, 1455, 1370, 1278, 1233, 1167, 981, 736; MS (EI)  $m/z$  (relative intensity) 375 (3) [ $\text{M}^+$ ], 57 (100); HRMS (EI) calcd. For  $\text{C}_{15}\text{H}_{16}\text{NO}_2\text{F}_7$ : 375.1069, Found: 375.1071.

#### 2y', 2-methyl-4-(perfluoropropan-2-yl)aniline<sup>10</sup>

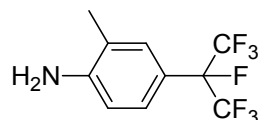

$^1\text{H}$  NMR (400 MHz,  $\text{CDCl}_3$ )  $\delta$  7.23 (m, 2H), 6.70 (d,  $J = 9.0$  Hz, 1H), 3.82 (br, 2H), 2.18 (s, 3H);  $^{19}\text{F}$  NMR (376 MHz,  $\text{CDCl}_3$ )  $\delta$  -75.84 (d,  $J = 7.4$  Hz), -182.37 (hept,  $J = 7.3$  Hz); the pure product was spectrally identical to material previously synthesized.

#### 2z, 13-methyl-3-(perfluoropropan-2-yl)-7,8,9,11,12,13,15,16-octahydro-6H-cyclopenta[a]phenanthren-17(14H)-one

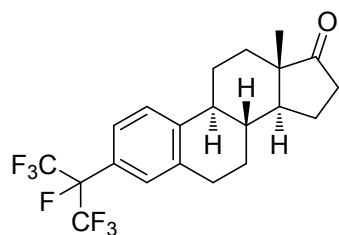

$^1\text{H}$  NMR (400 MHz,  $\text{CDCl}_3$ )  $\delta$  7.44-7.37 (m, 2H), 7.33 (s, 1H), 3.09 – 2.90 (m, 2H), 2.55 (dd,  $J = 18.8, 8.7$  Hz, 1H), 2.49-2.44 (m, 1H), 2.39-2.33 (m, 1H), 2.33 – 2.00 (m, 4H), 1.70 – 1.49 (m, 6H), 0.95 (s, 3H);  $^{13}\text{C}$  NMR (100 MHz,  $\text{CDCl}_3$ )  $\delta$  142.94, 137.37 (d,  $J = 1.9$  Hz), 128.23, 126.10 (d,  $J = 10.5$  Hz), 124.14 (d,  $J = 20.5$  Hz), 122.89 (d,  $J = 10.1$  Hz), 120.67 (qd,  $J = 288.3, 27.3$  Hz), 95.78 – 88.03 (m), 50.51, 47.90, 44.33, 37.77, 35.81, 31.54, 29.70, 26.25, 25.49, 21.57, 13.81;  $^{19}\text{F}$  NMR (376 MHz,  $\text{CDCl}_3$ )  $\delta$  -75.74 (d,  $J = 6.6$  Hz), -182.56 – -182.78 (m); IR (KBr,  $\text{cm}^{-1}$ ):  $\nu$  2929, 2856, 1743, 1558, 1541, 1507, 1457, 1277, 1219, 981, 764, 750; MS (EI)  $m/z$  (relative intensity) 422 [ $\text{M}^+$ ], 378 (100); HRMS (EI) calcd. For  $\text{C}_{21}\text{H}_{21}\text{OF}_7$ : 422.1481, Found: 422.1484.

#### 4, 1-(but-3-en-1-yl)-2-(perfluoropropan-2-yl)benzene

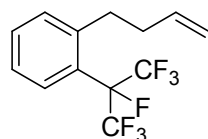

$^1\text{H}$  NMR (400 MHz,  $\text{CDCl}_3$ )  $\delta$  7.48 (d,  $J = 8.1$  Hz, 1H), 7.41 (t,  $J = 7.5$  Hz, 1H), 7.33 – 7.27 (m, 2H), 5.91-5.81 (m, 1H), 5.11 – 4.92 (m, 2H), 2.97 – 2.82 (m, 2H), 3.00 – 2.80 (m, 2H);  $^{13}\text{C}$  NMR (100 MHz,  $\text{CDCl}_3$ )  $\delta$  142.60, 137.68, 133.39, 130.60, 126.81 – 126.38 (m), 126.11 (d,  $J = 1.5$  Hz), 123.85 (d,  $J = 19.2$  Hz), 122.99 (qd,  $J = 289.8, 28.3$  Hz), 115.06, 96.59 – 92.25 (m), 36.69, 34.76;  $^{19}\text{F}$  NMR (376 MHz,  $\text{CDCl}_3$ )  $\delta$  -74.67 (d,  $J = 6.5$  Hz), -179.11 – -179.25 (m); IR (KBr,  $\text{cm}^{-1}$ ):  $\nu$

<sup>10</sup> S. Zhou, T. Yan, Y. Li, Z. Jia, B. Wang, Y. Zhao, Y. Qiao, L. Xiong, Y. Li, Z. Li, *Org. Biomol. Chem.* **2014**, *12*, 6643.

2926, 1558, 1541, 1507, 1278, 1206, 976, 749; MS (EI) m/z (relative intensity) 300 [M<sup>+</sup>], 259 (100); HRMS (EI) calcd. For C<sub>13</sub>H<sub>11</sub>F<sub>7</sub>: 300.0749, Found: 300.0750.

2b

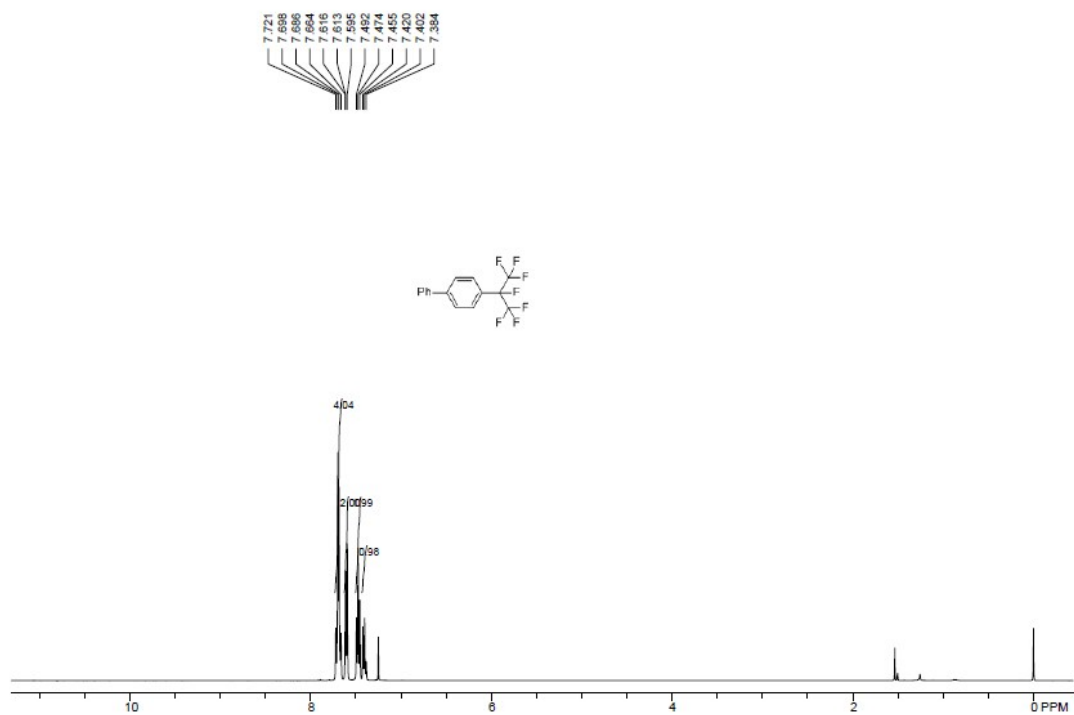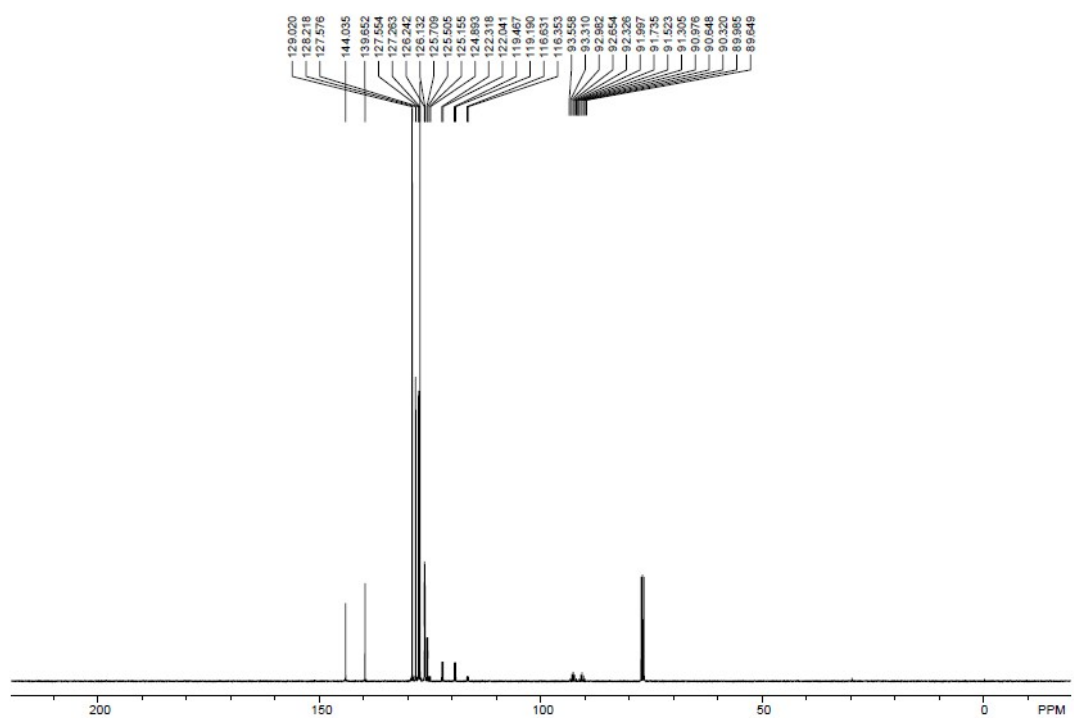



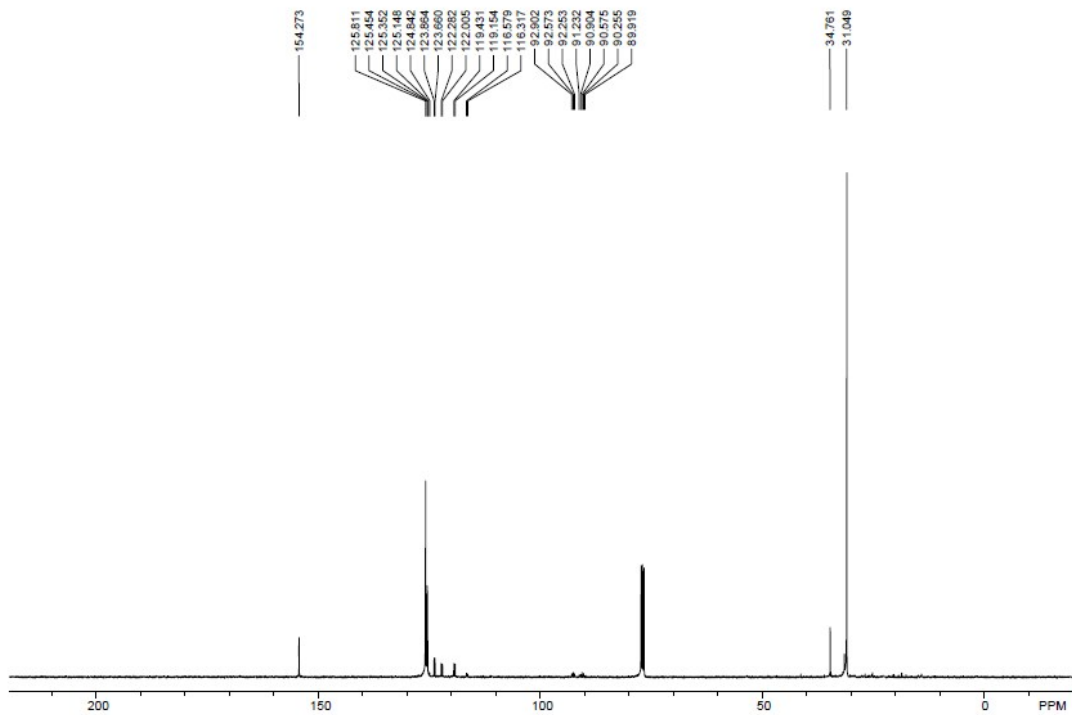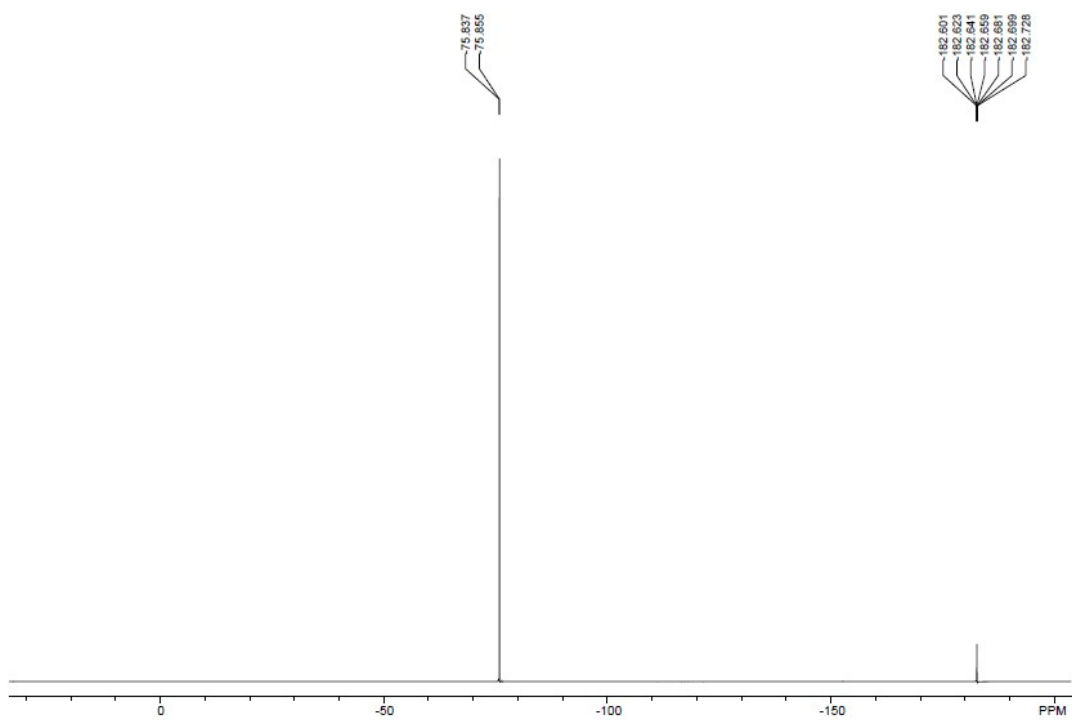

2d

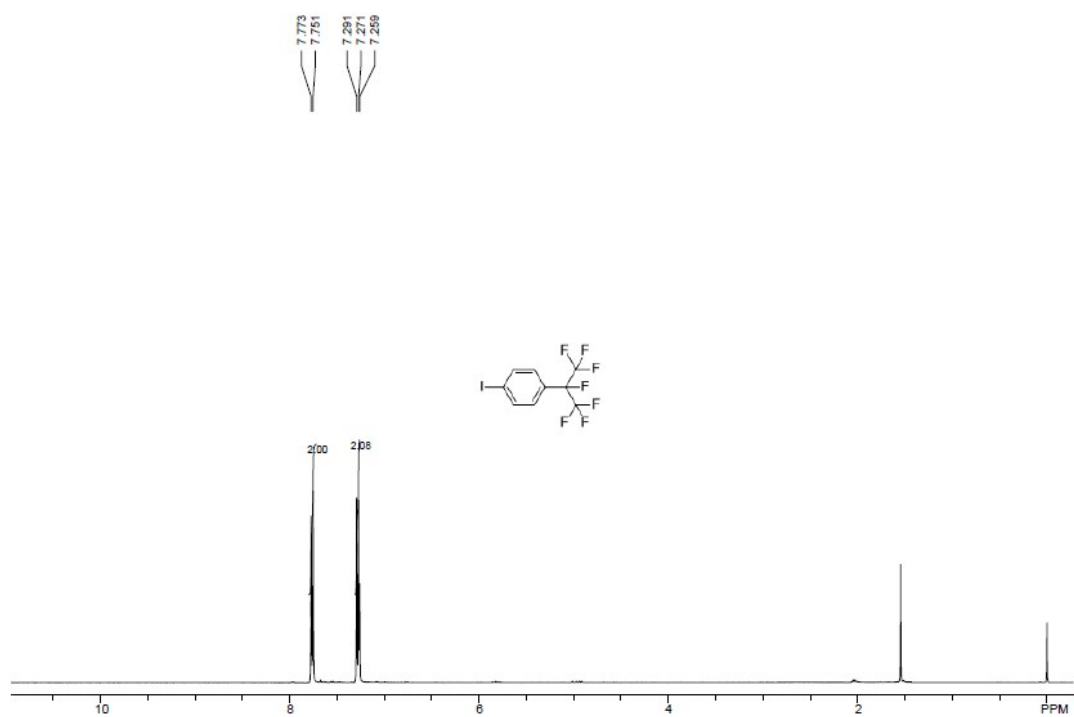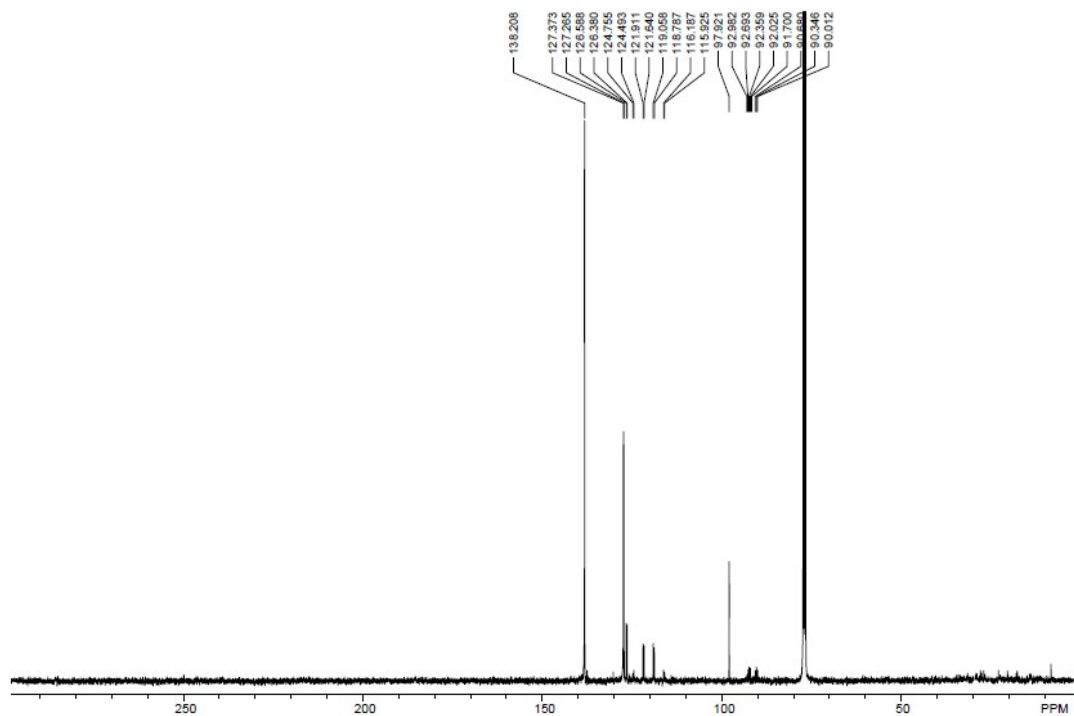

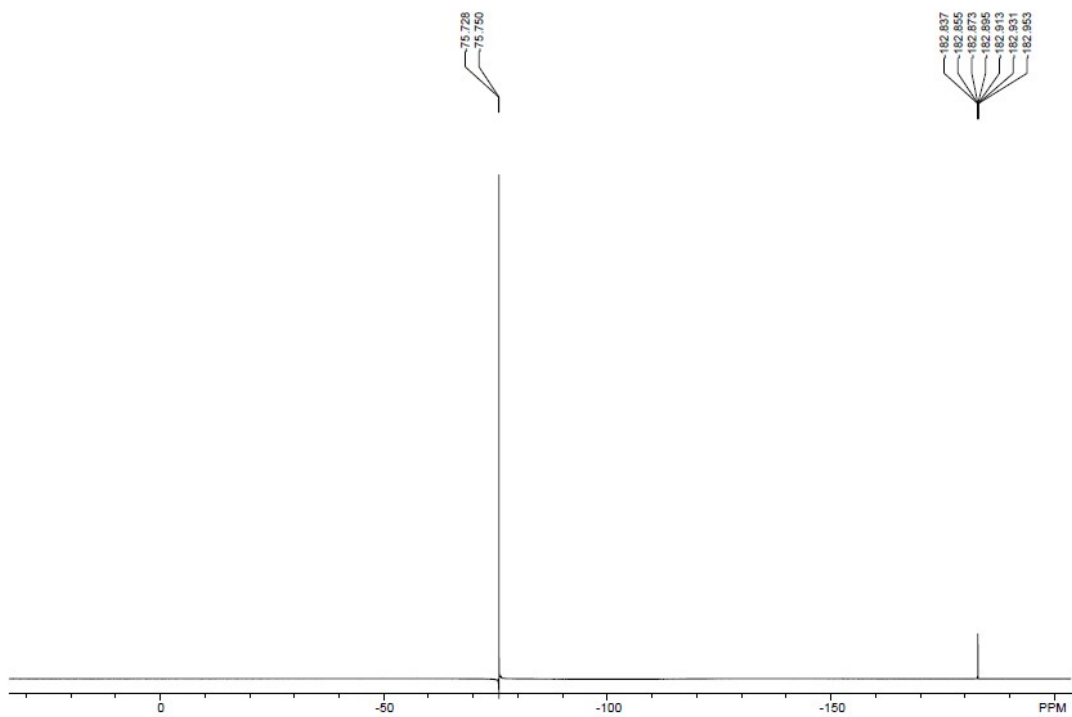

2e

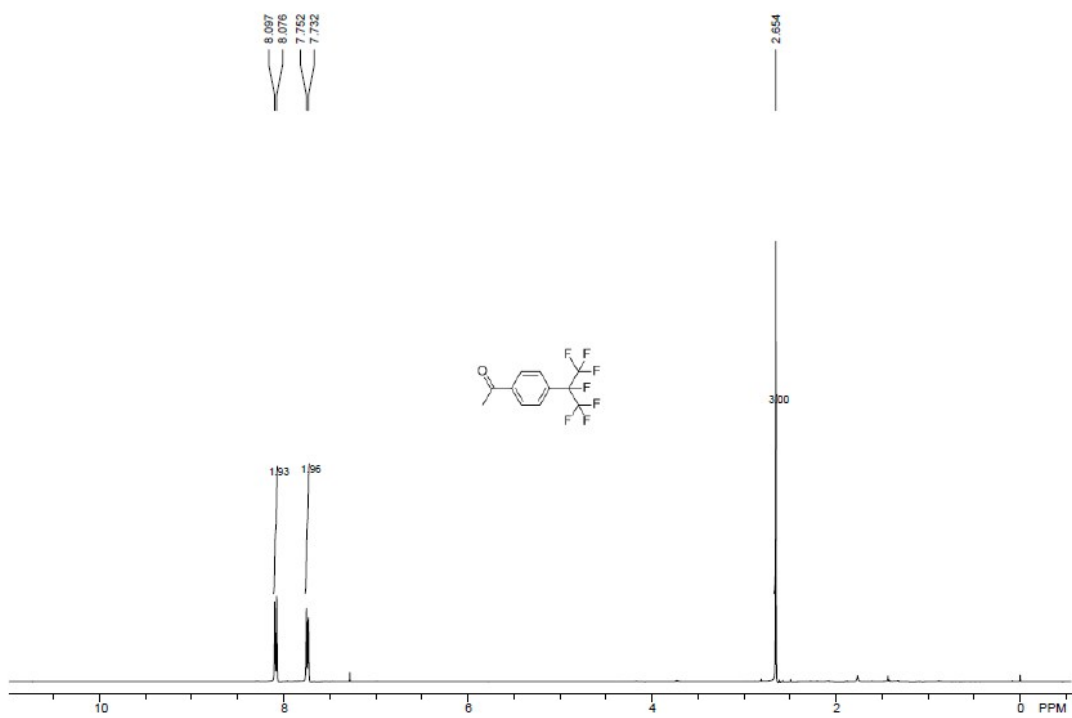

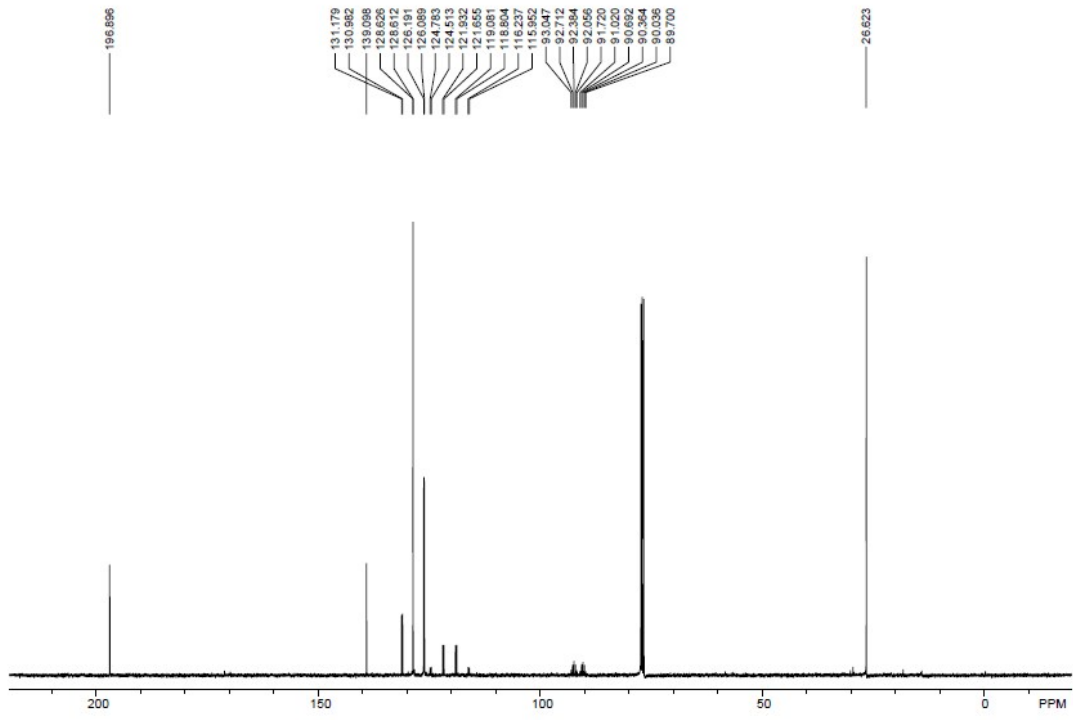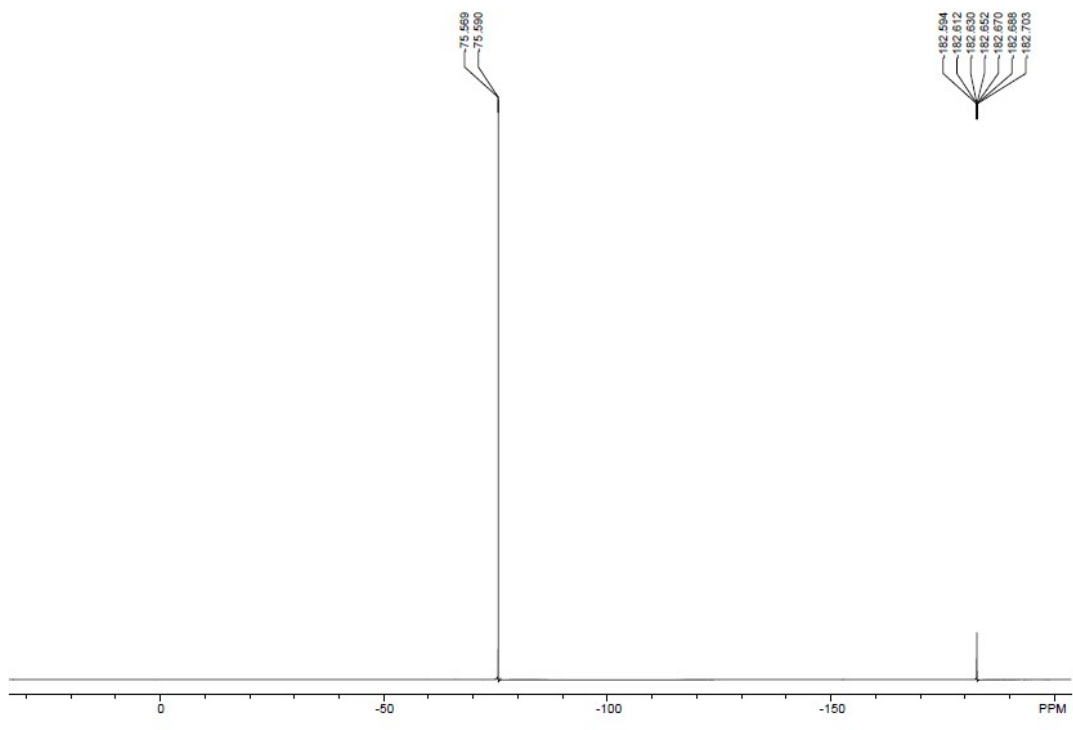



2f

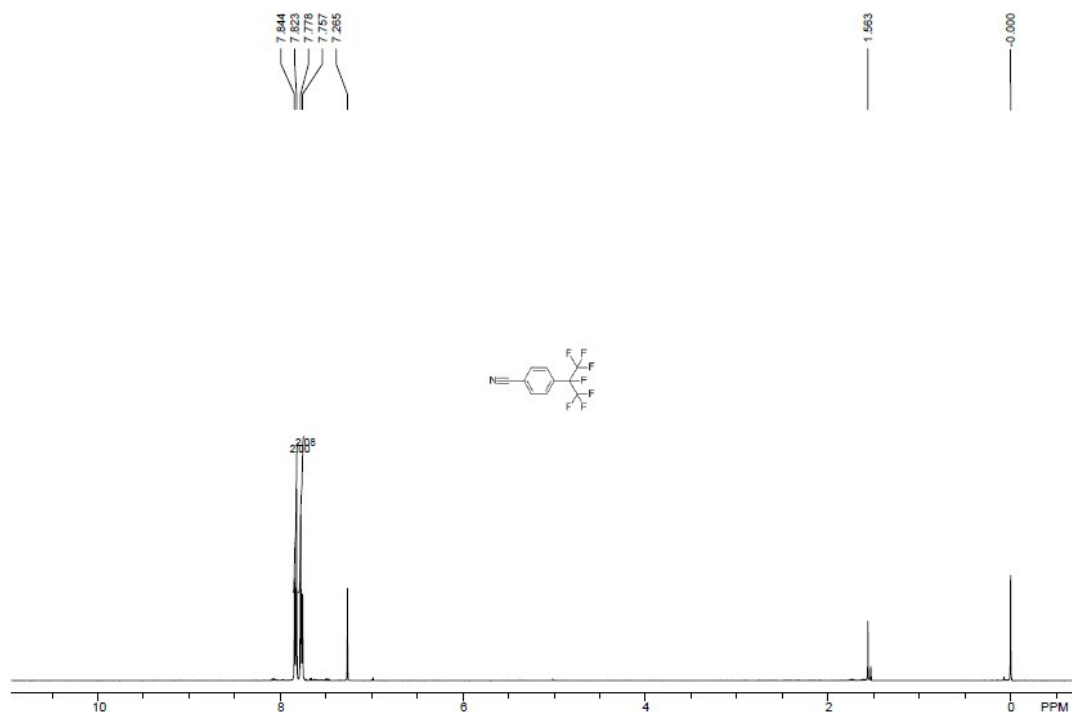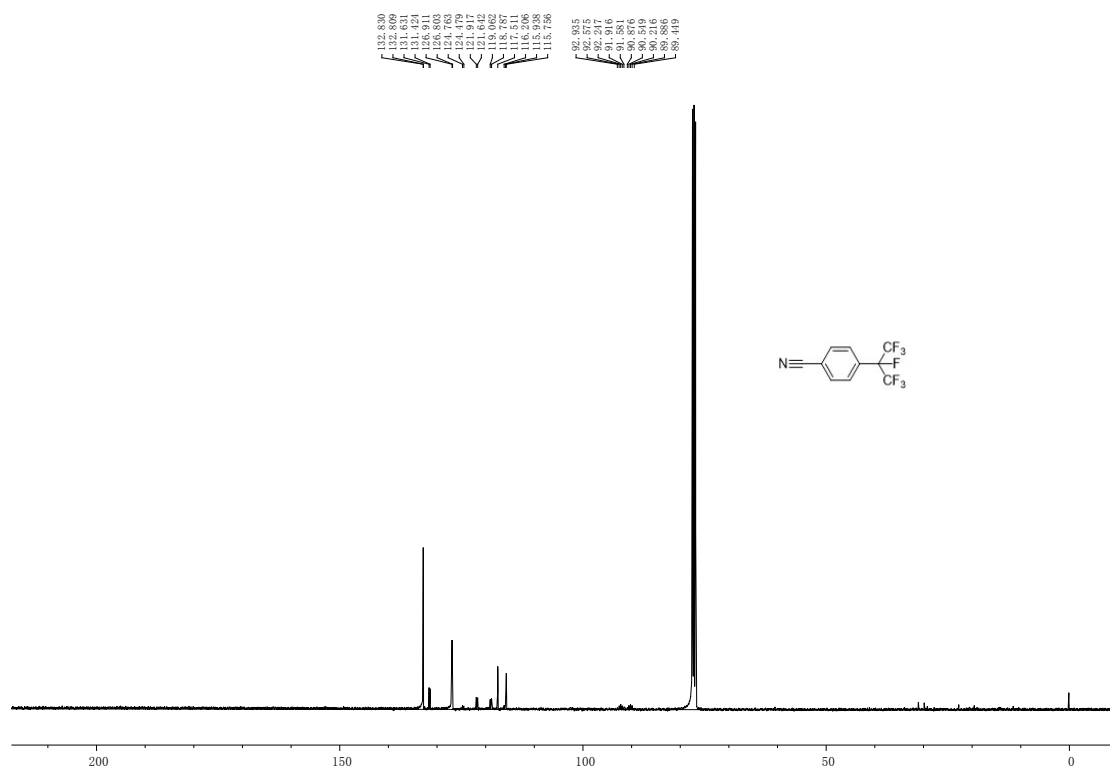

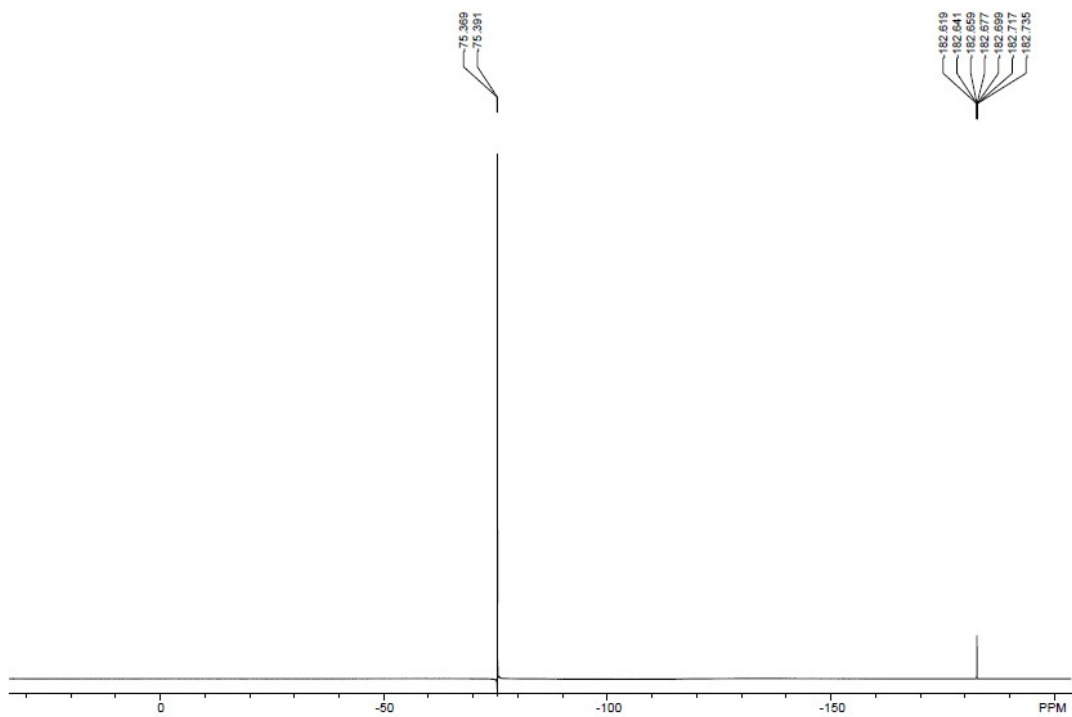

2g

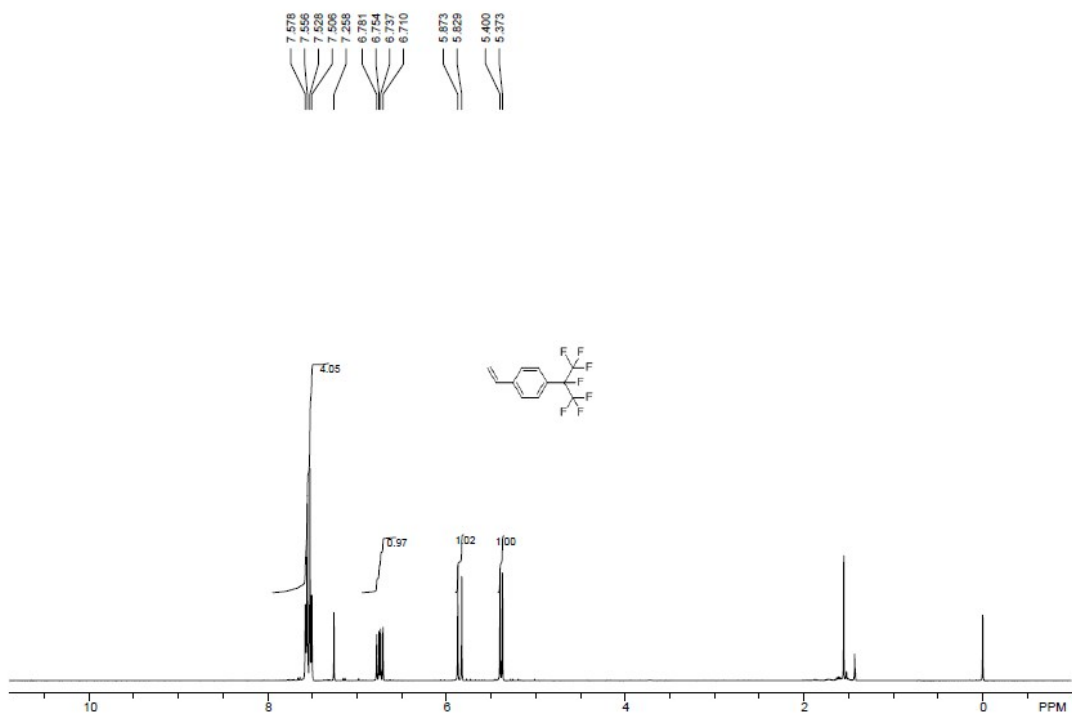

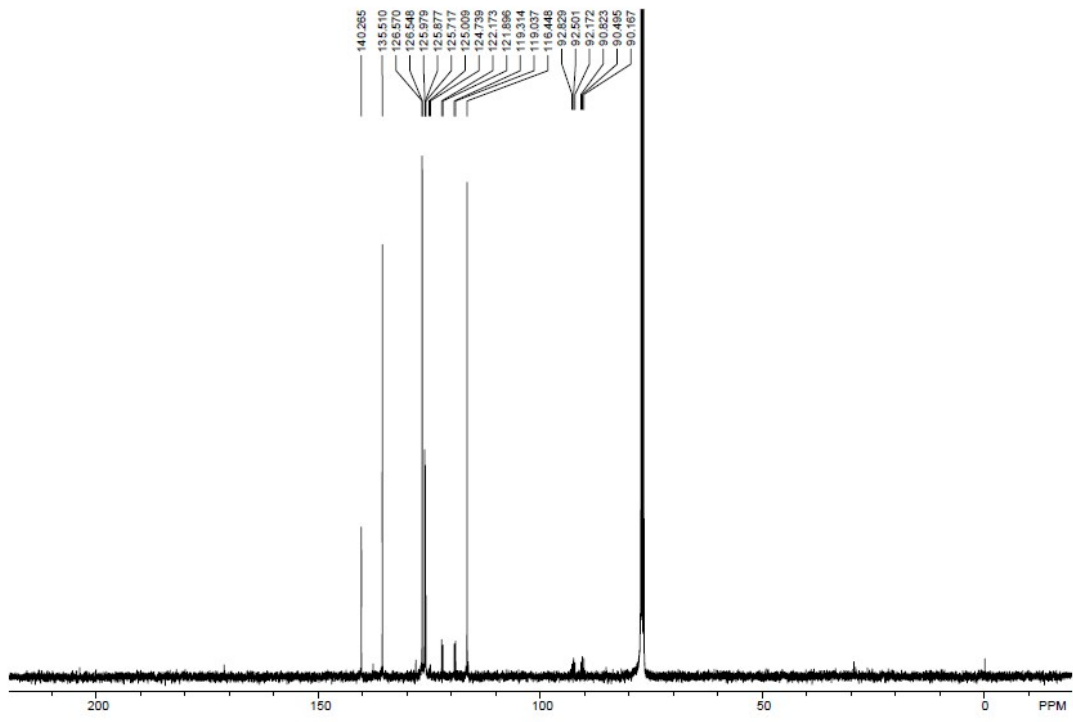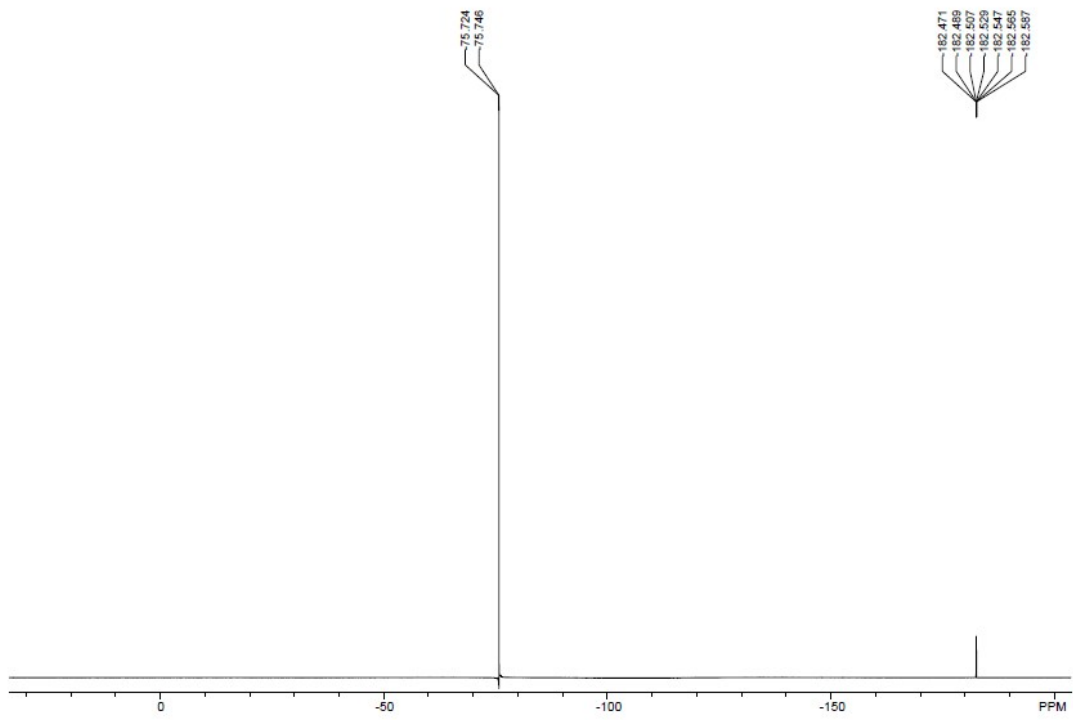

2h

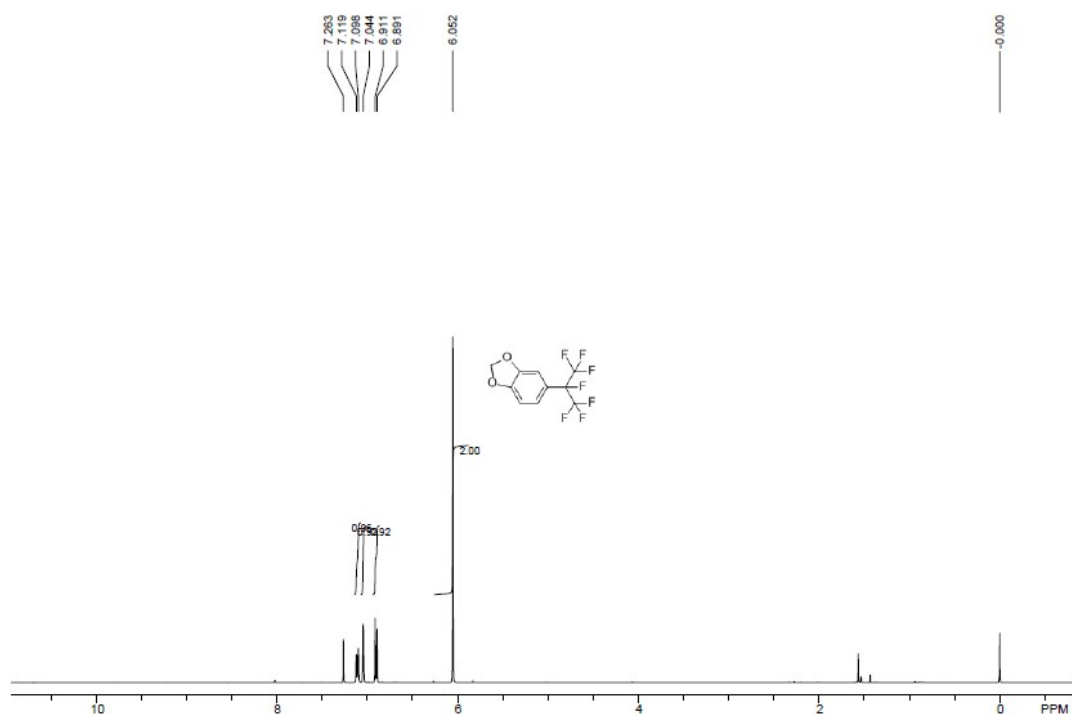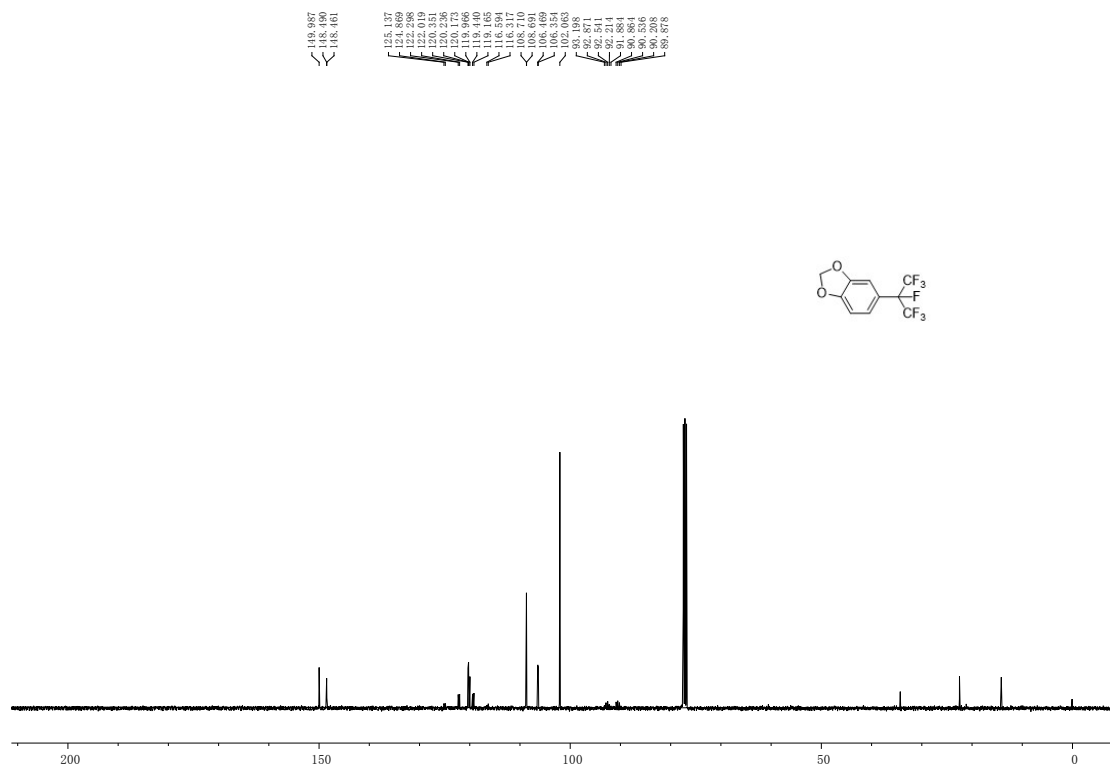

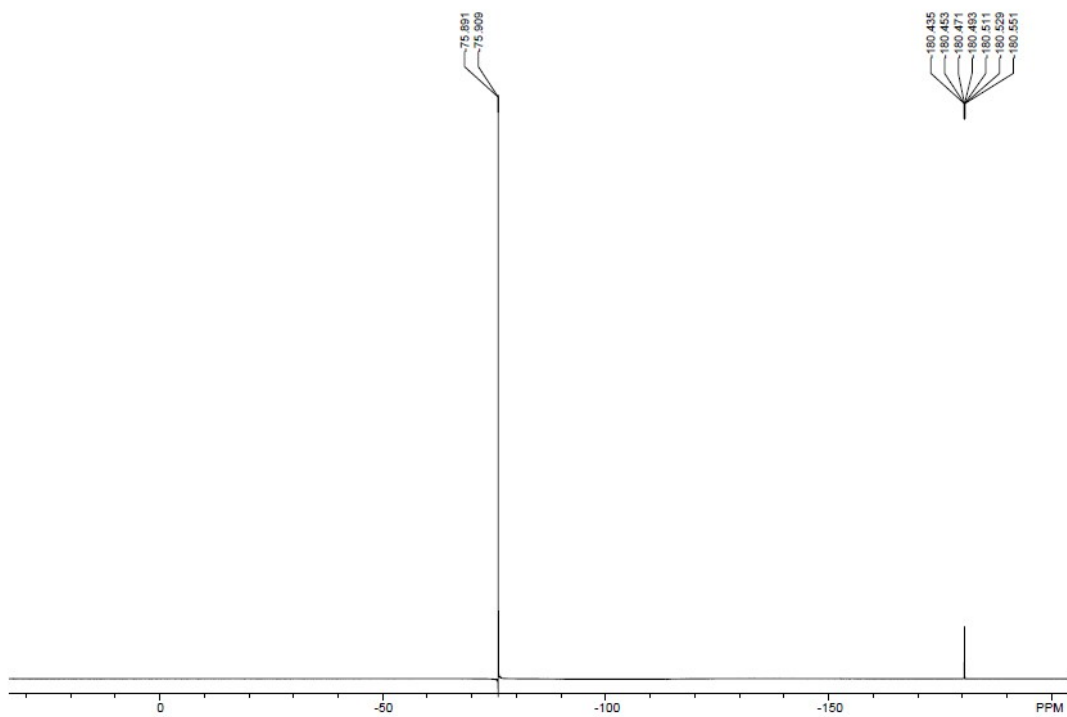

2i

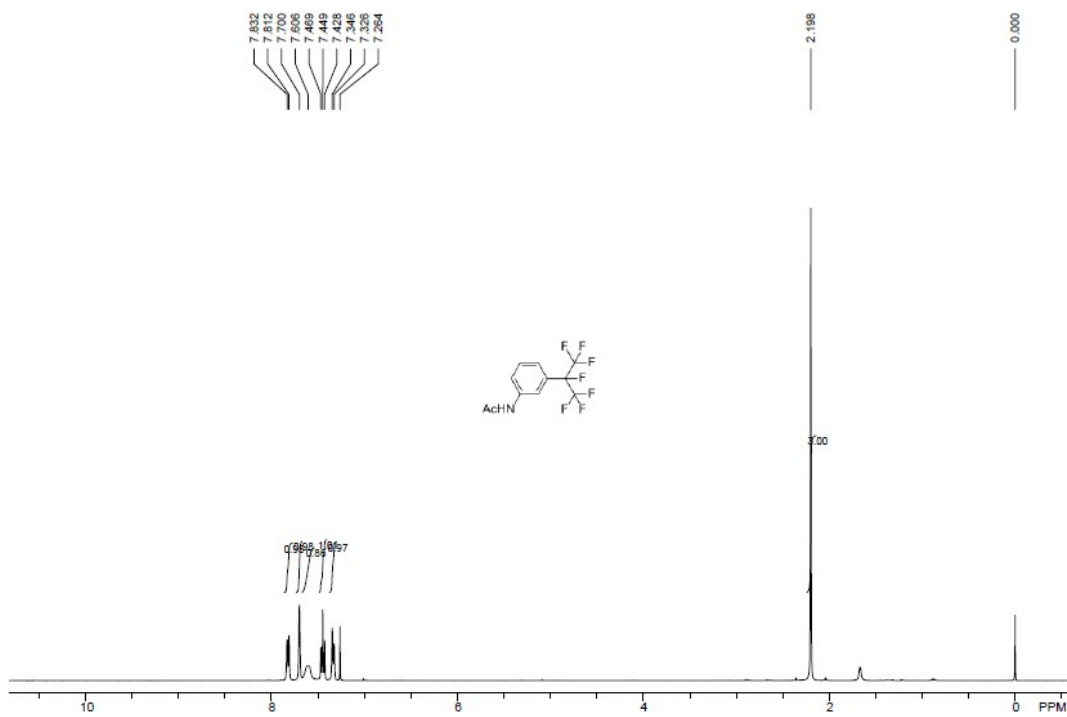

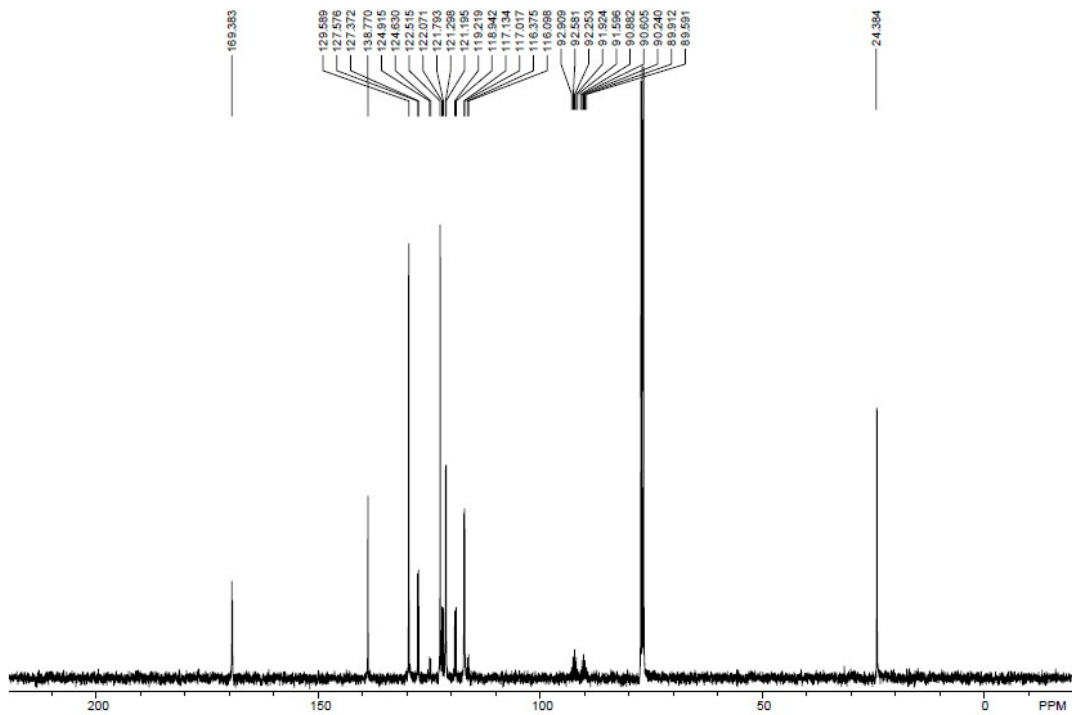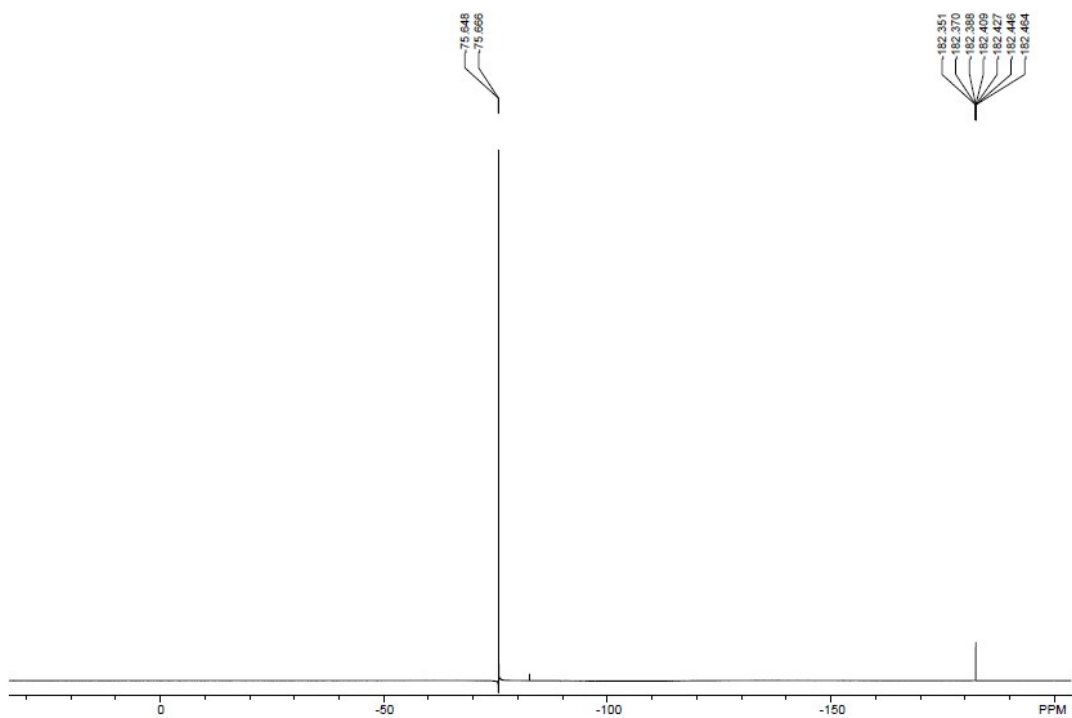

2j

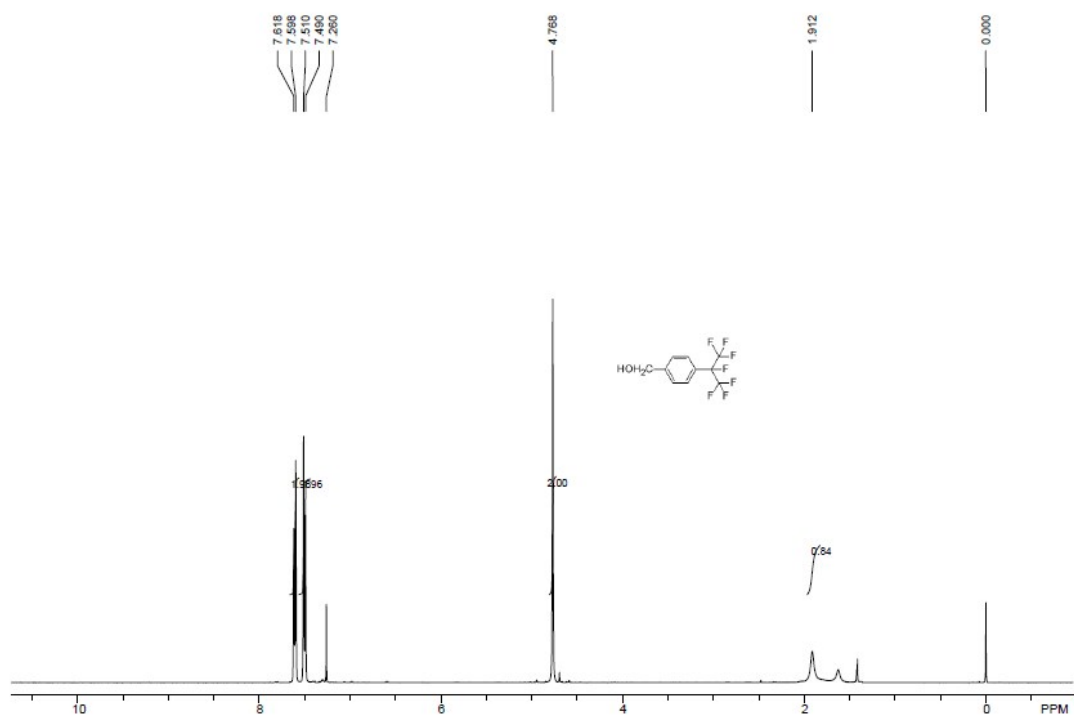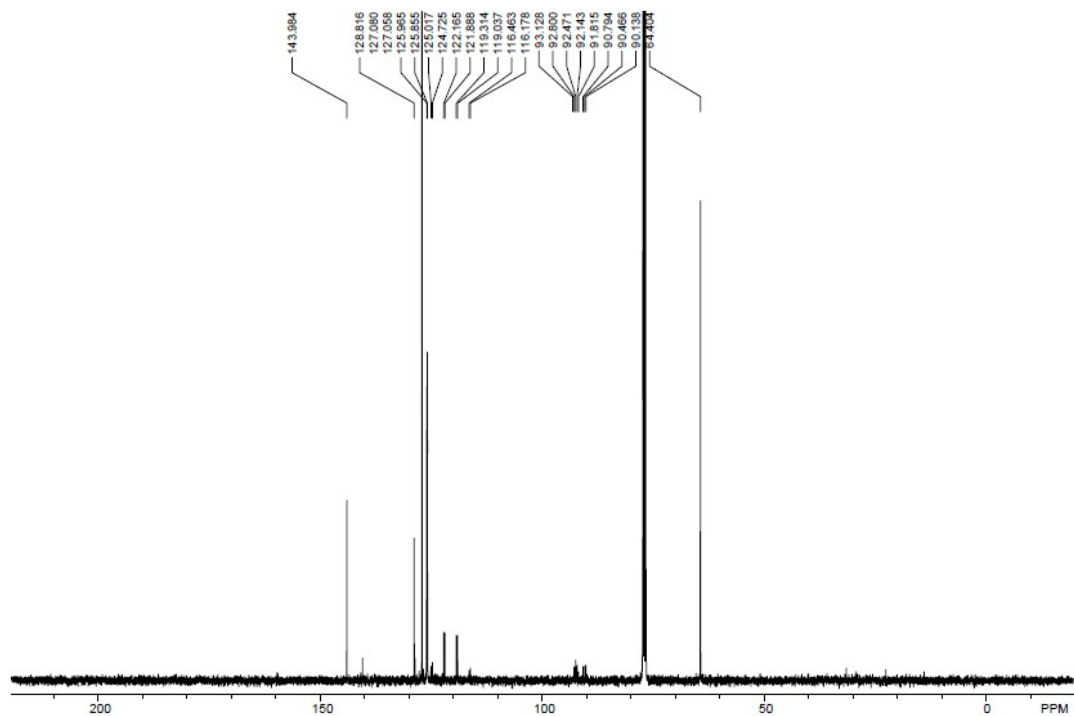

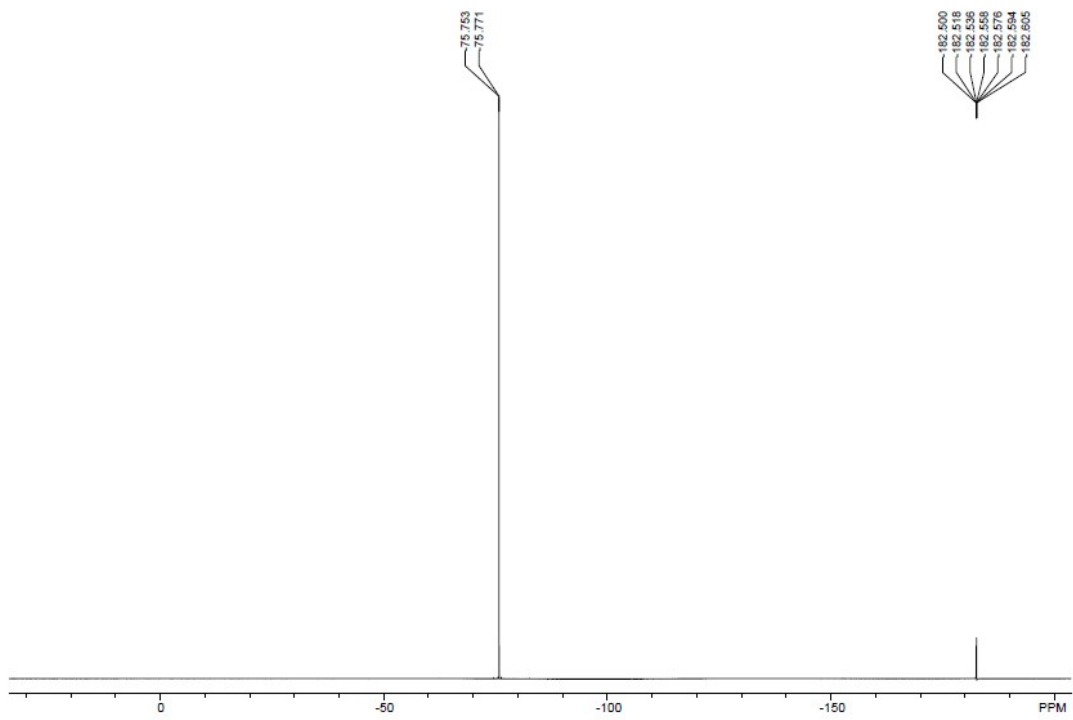

2k

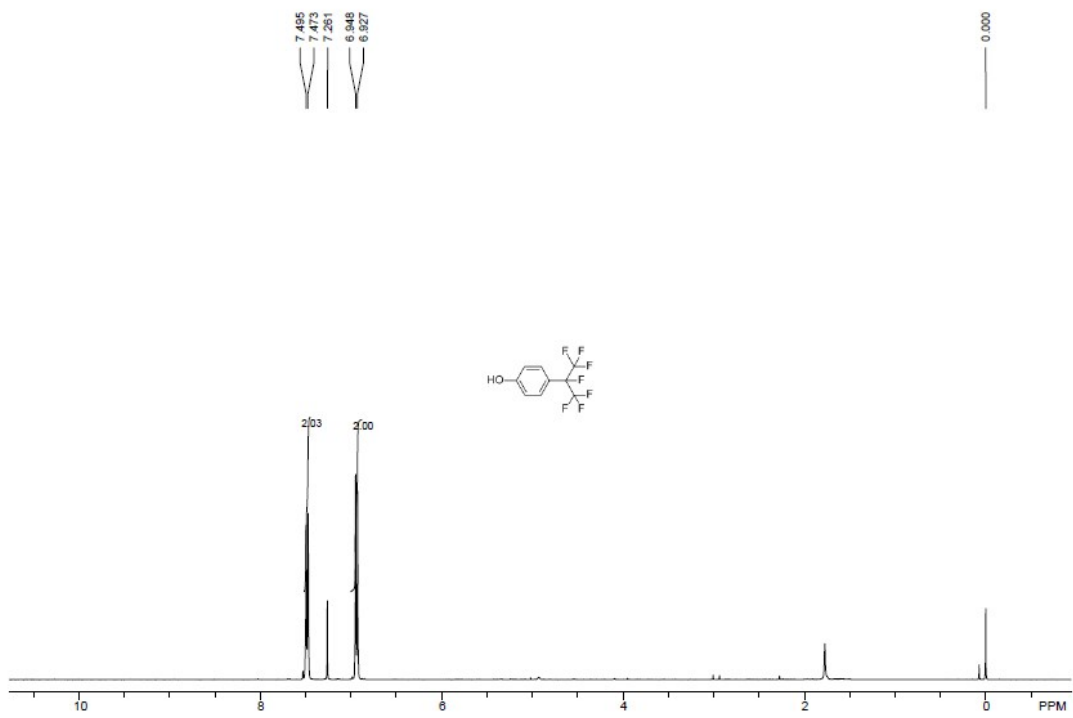



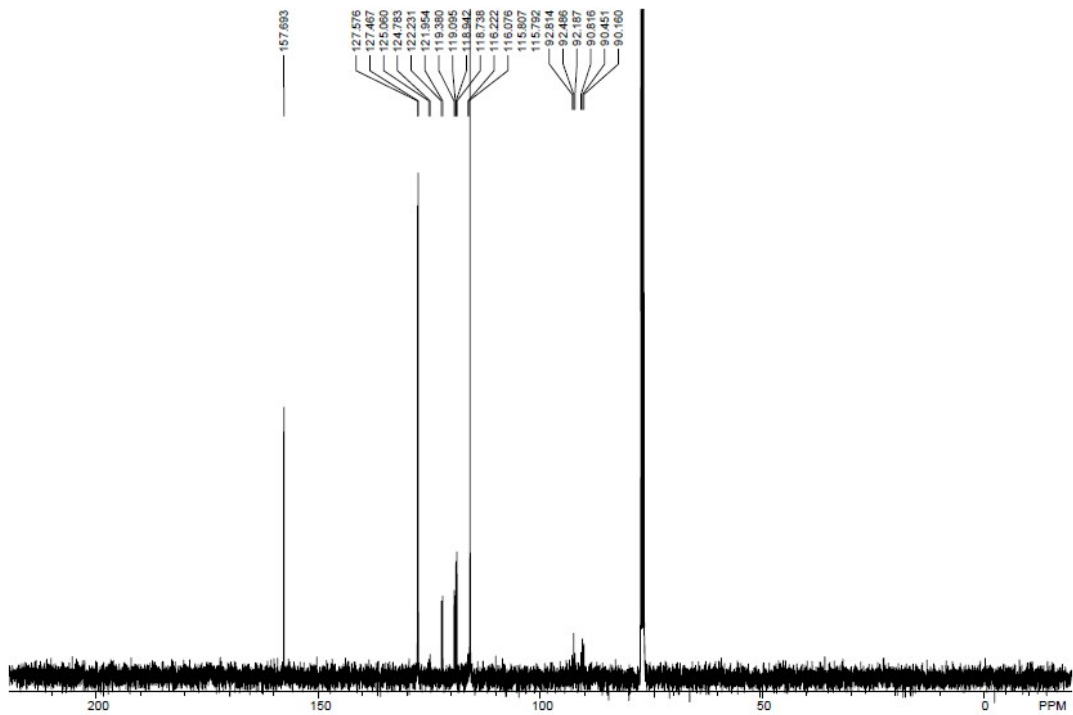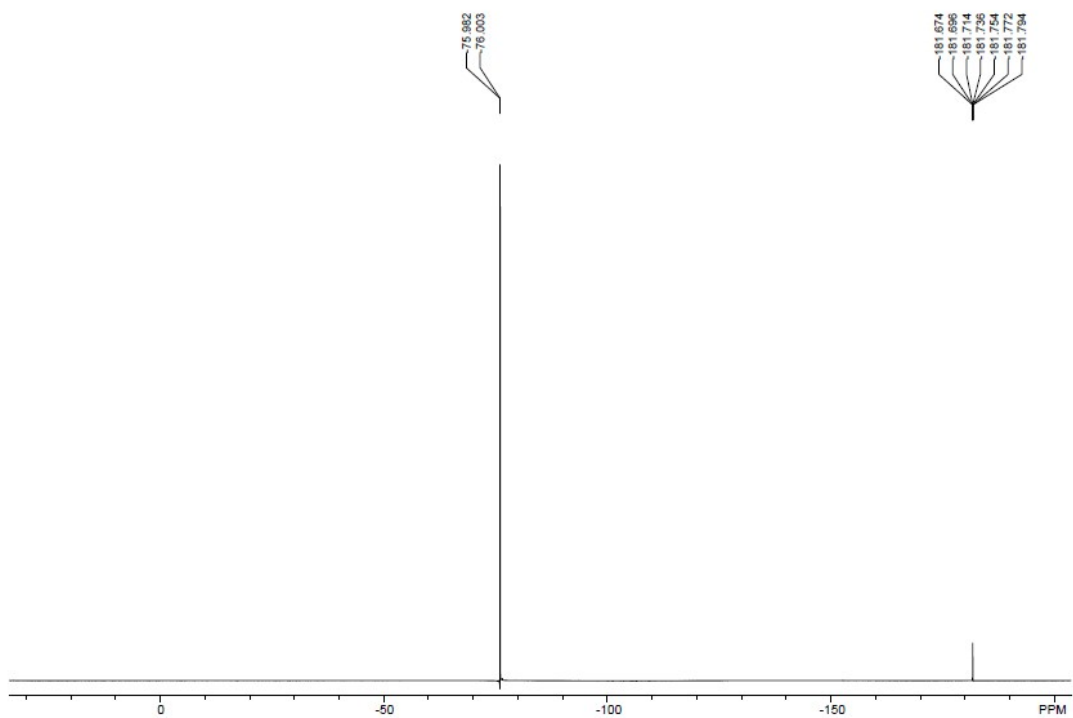

21

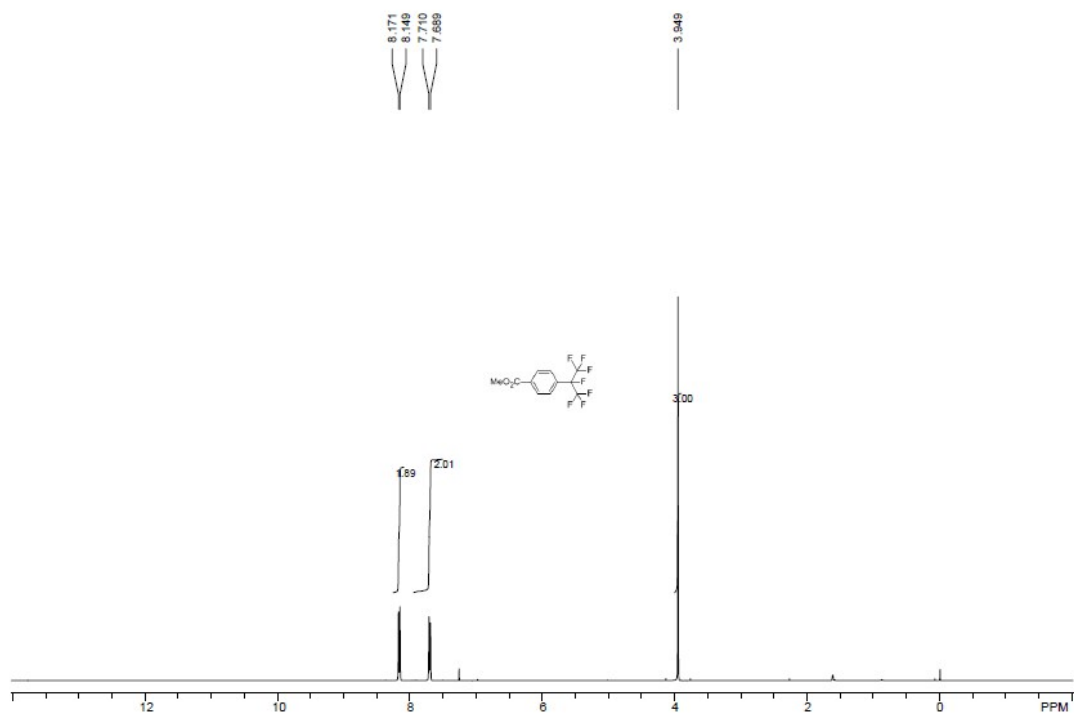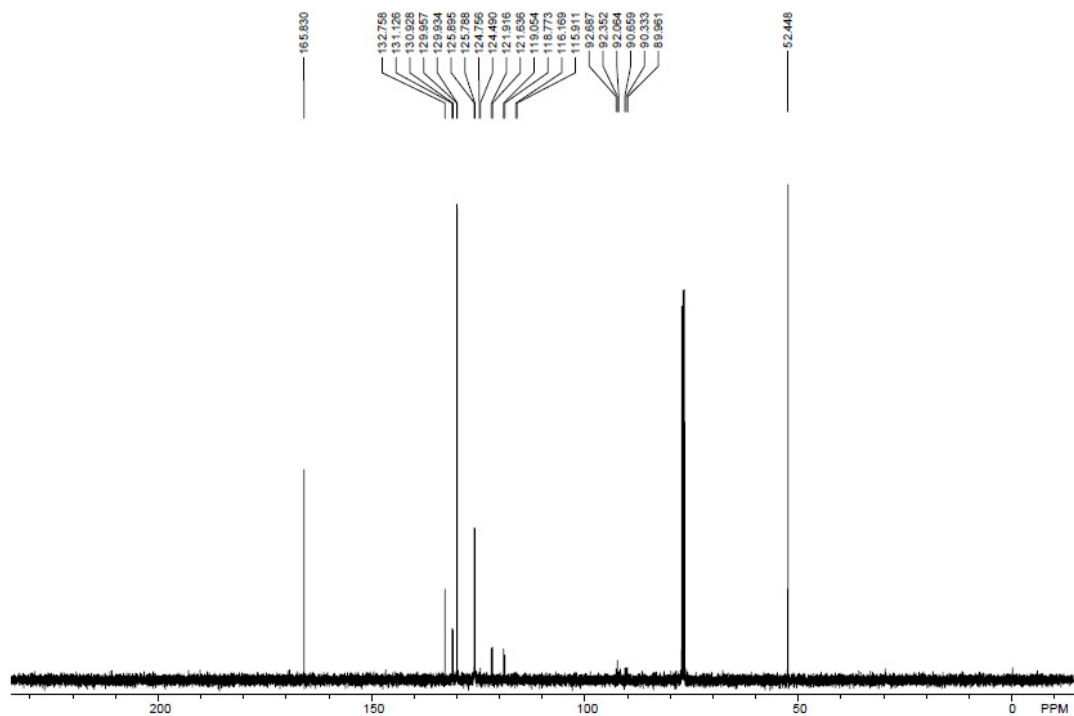

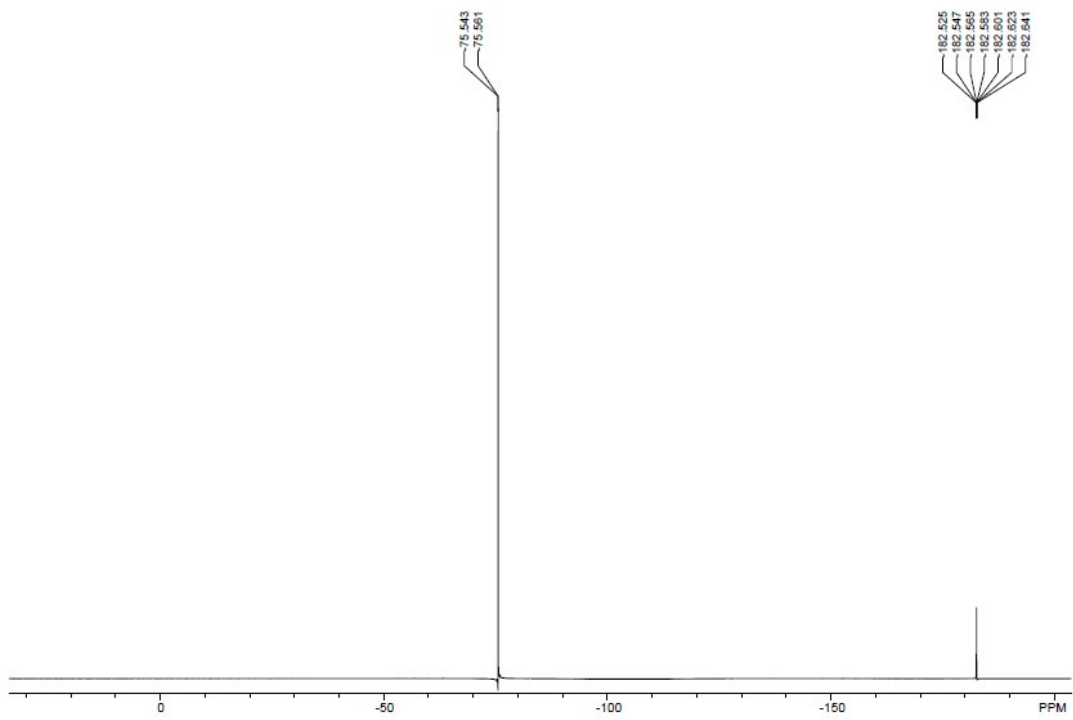

2m

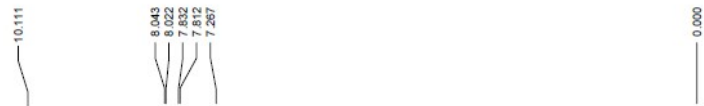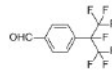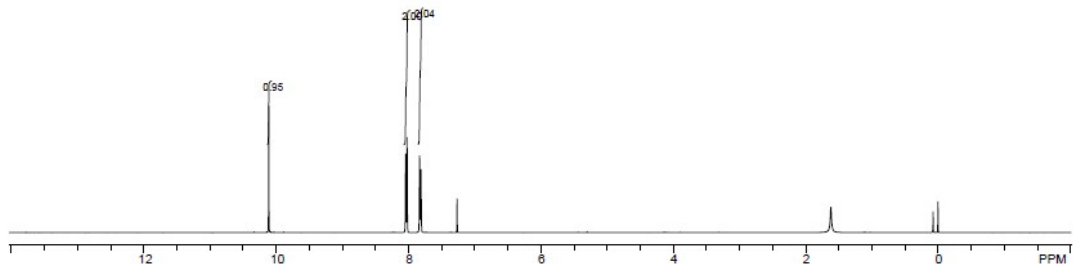

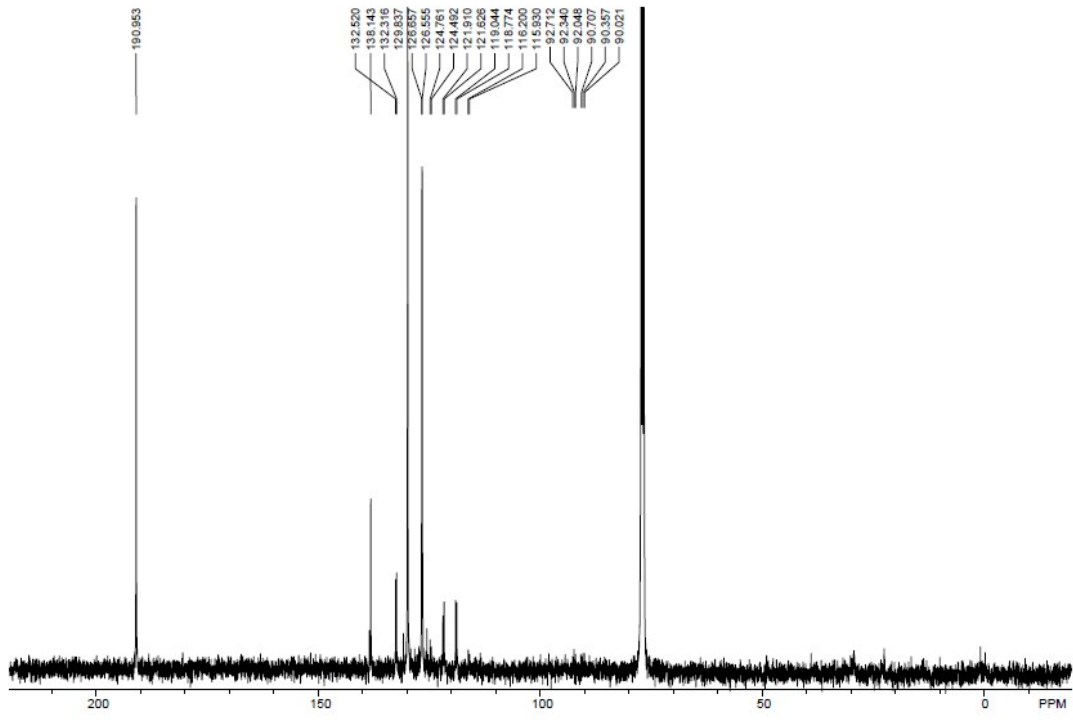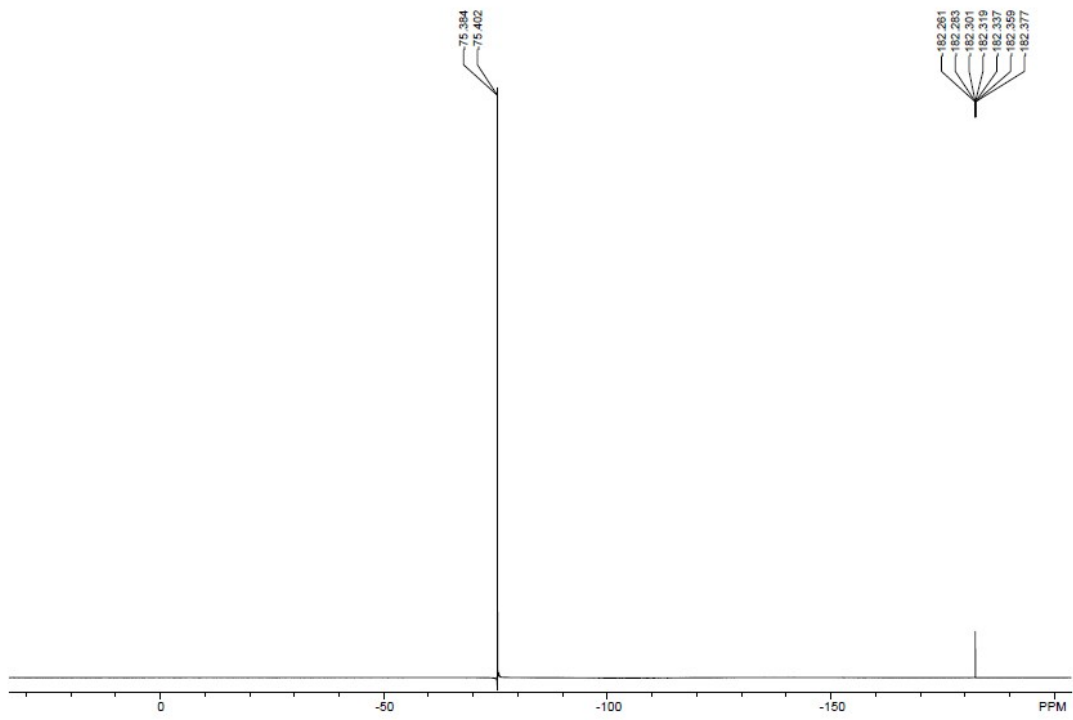

2n

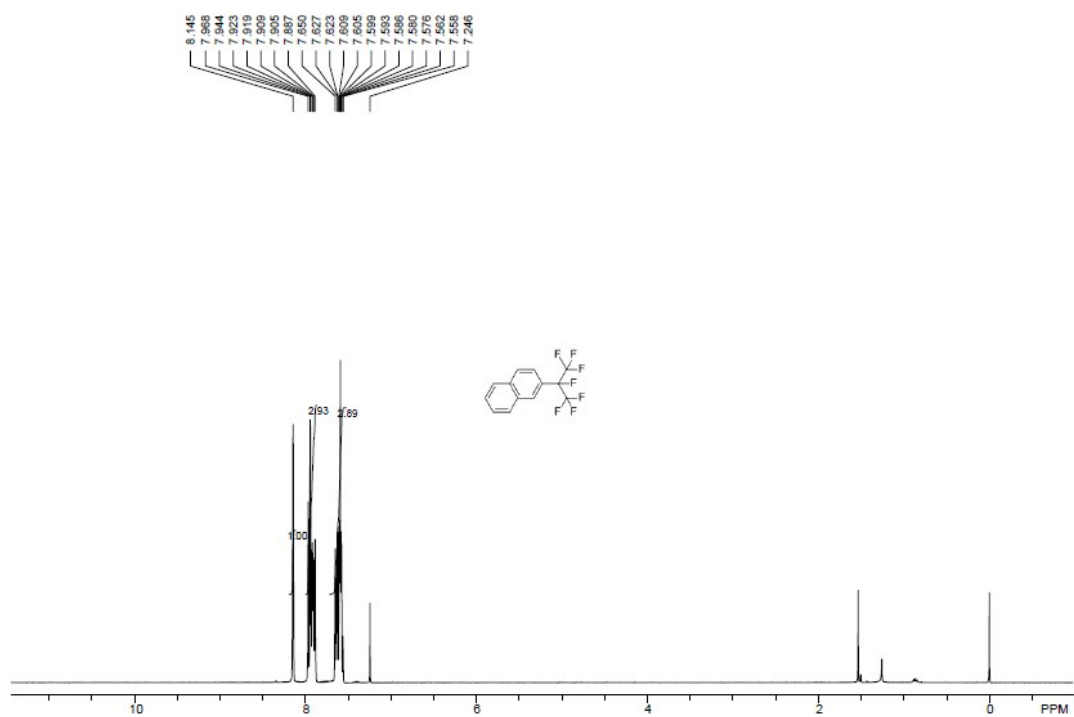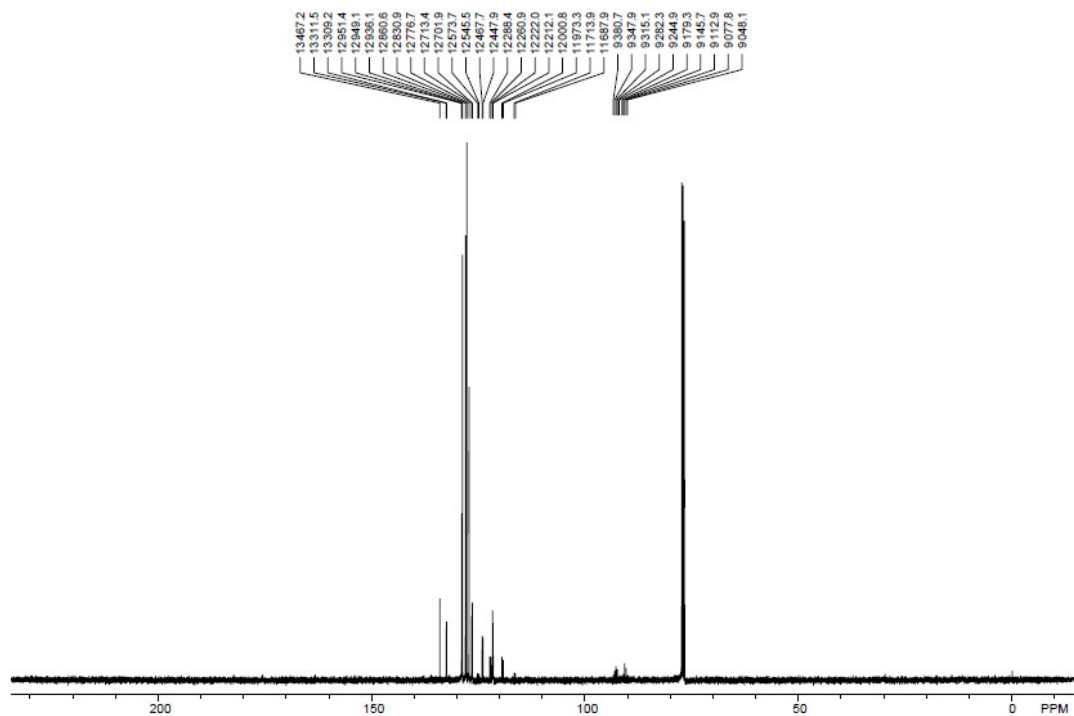

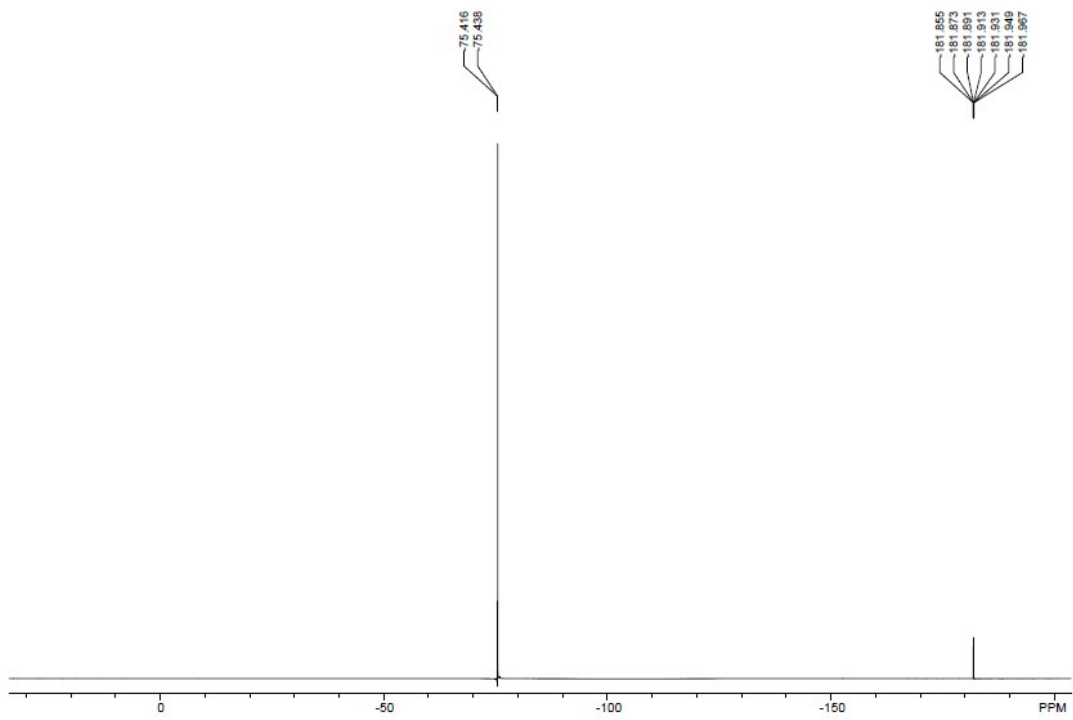

2p

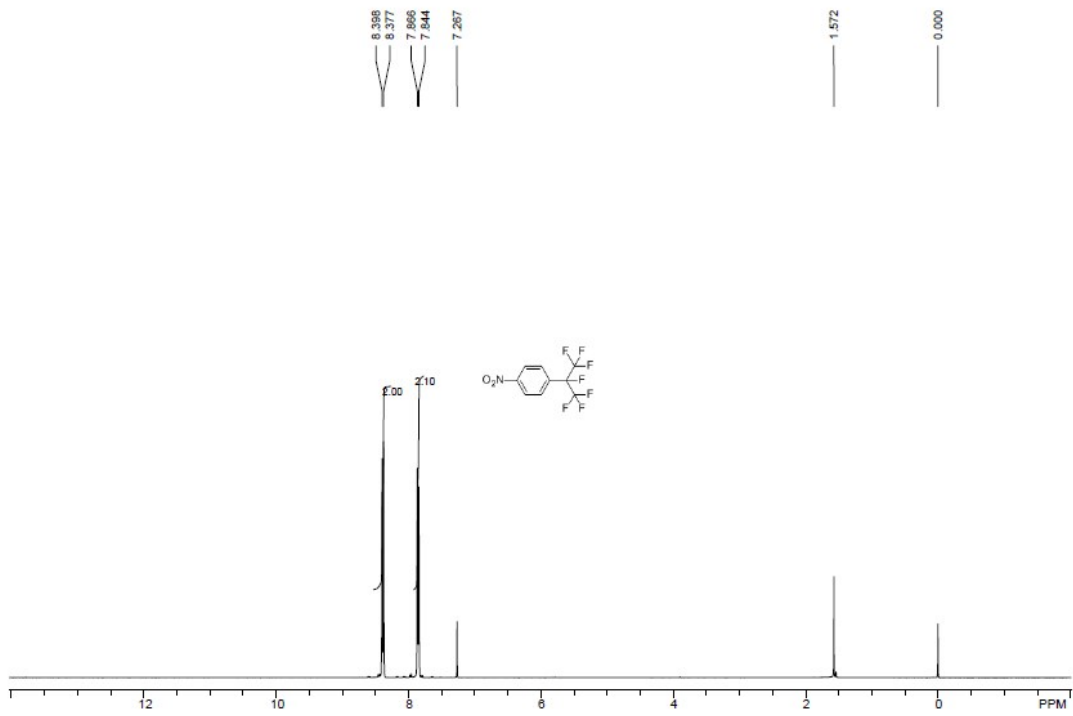

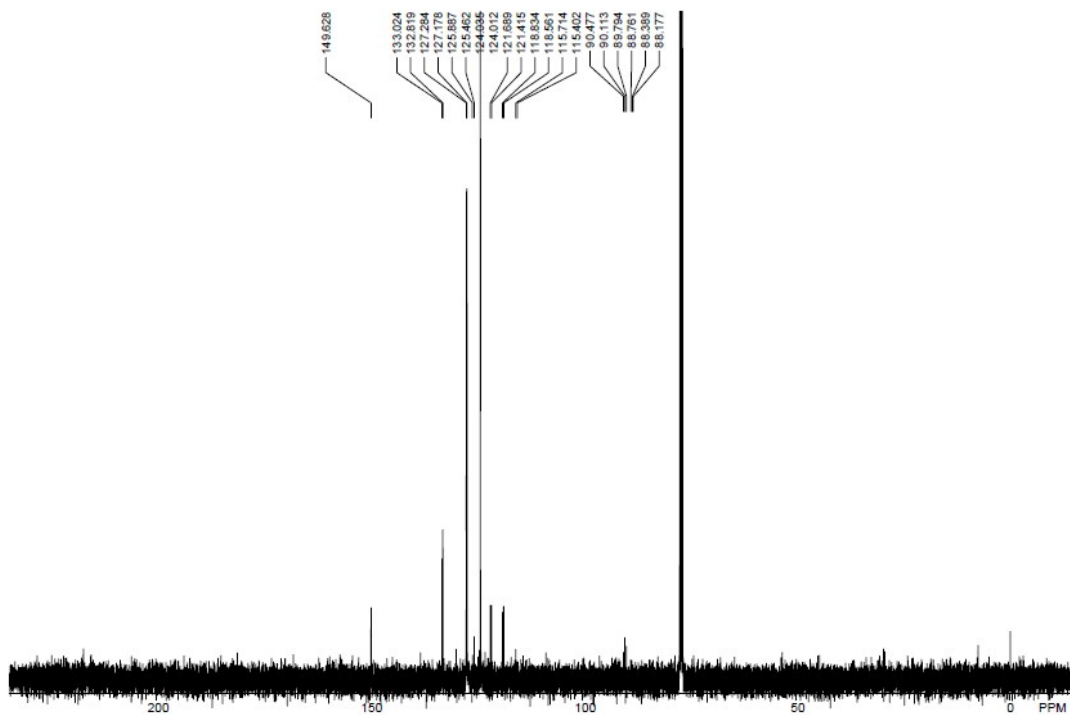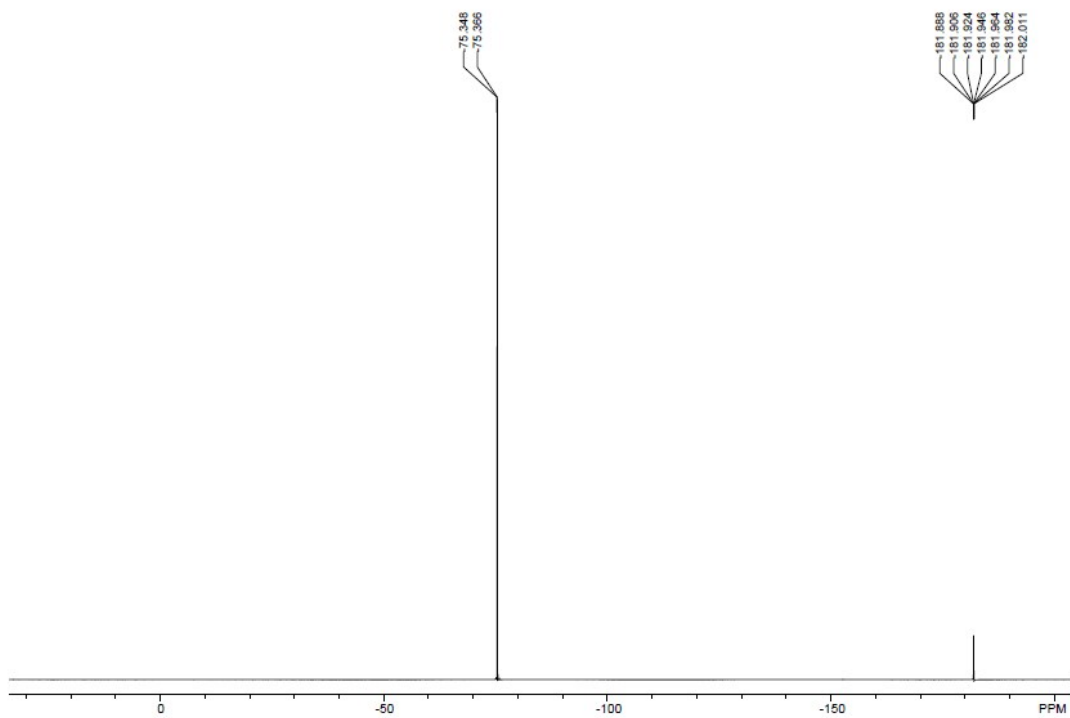

2q

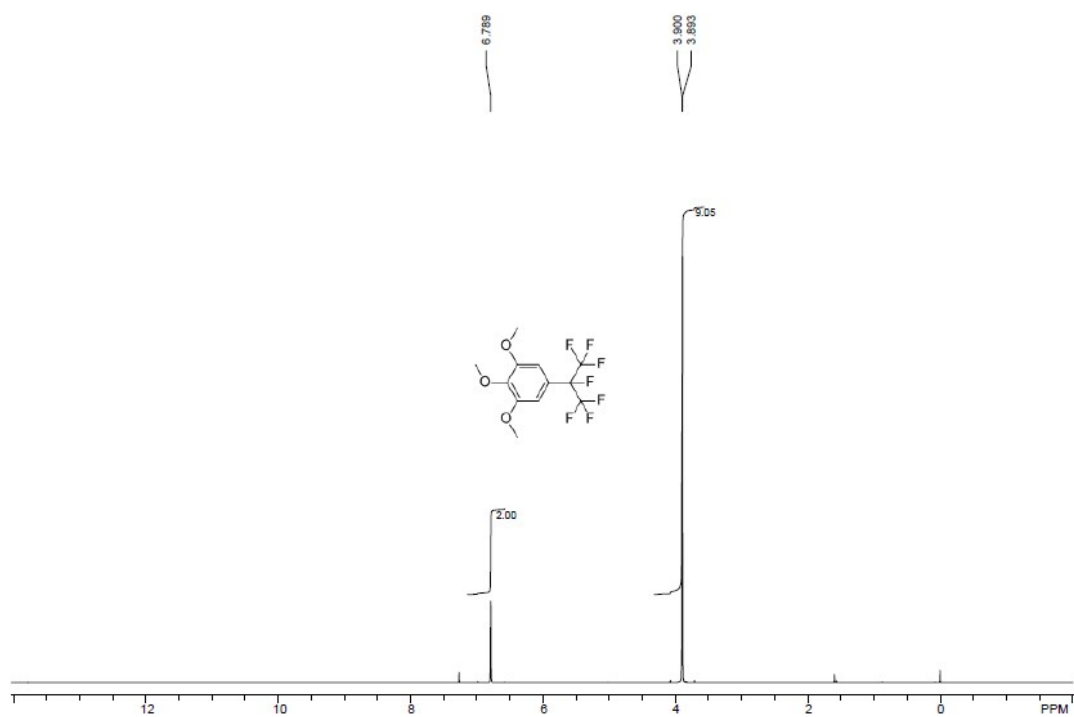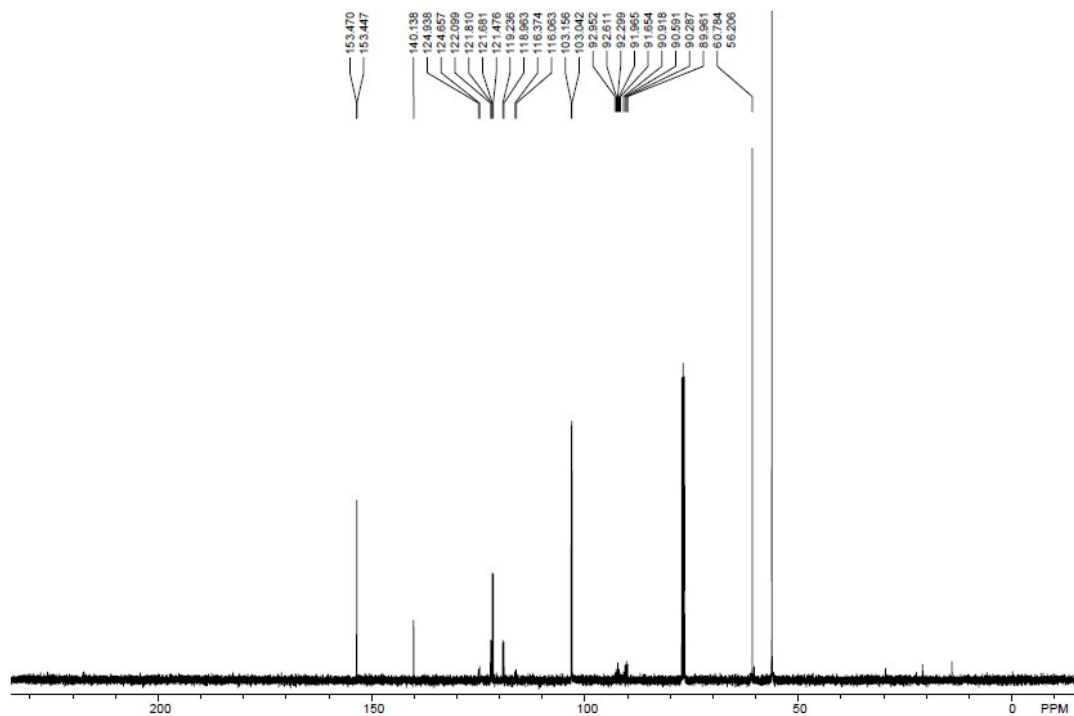



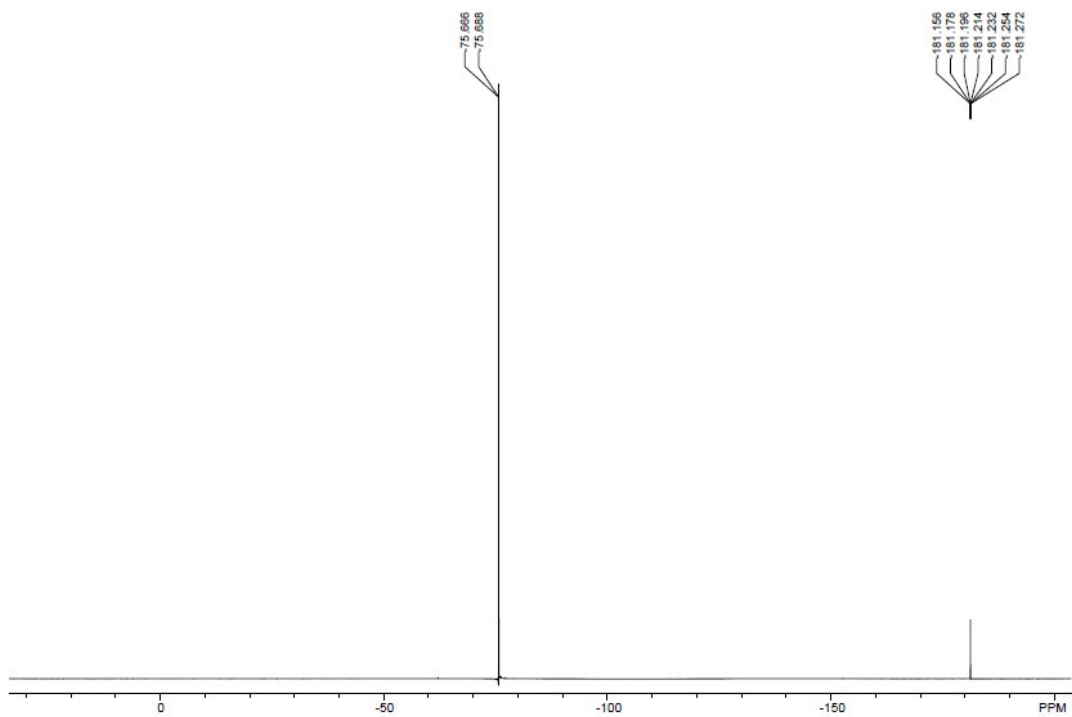

2r

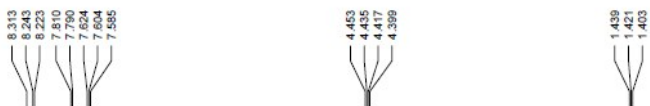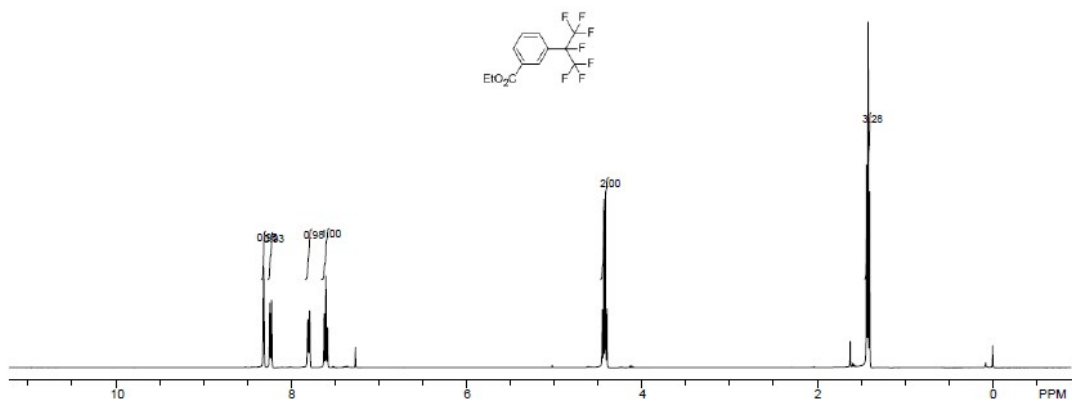

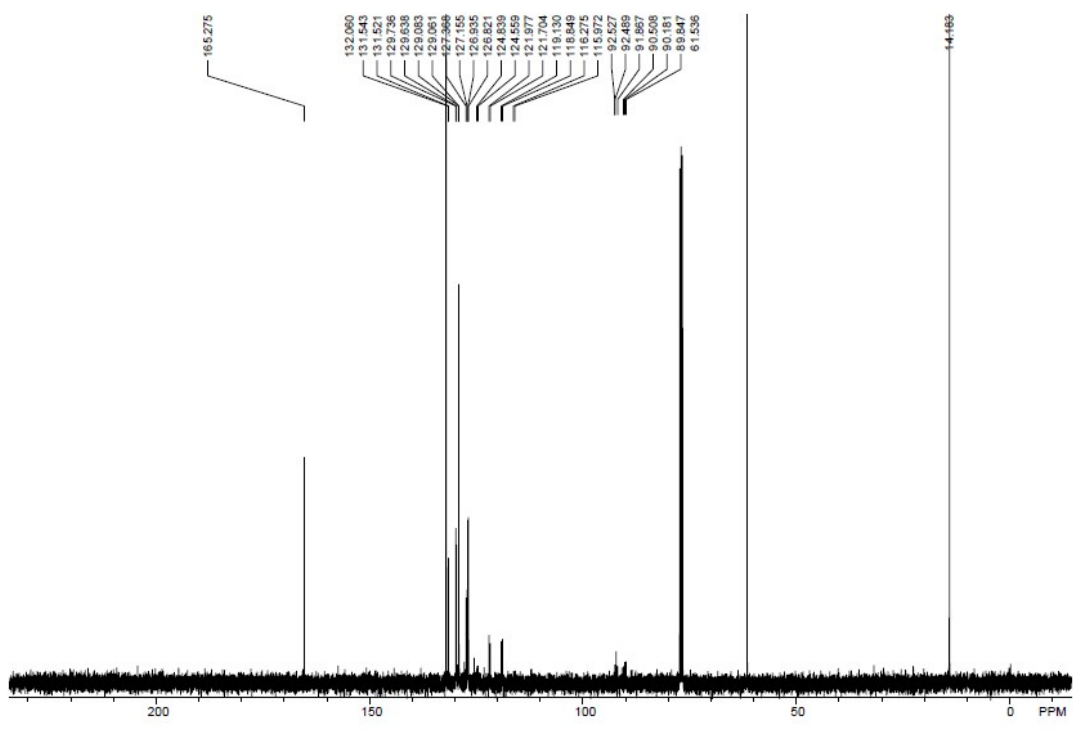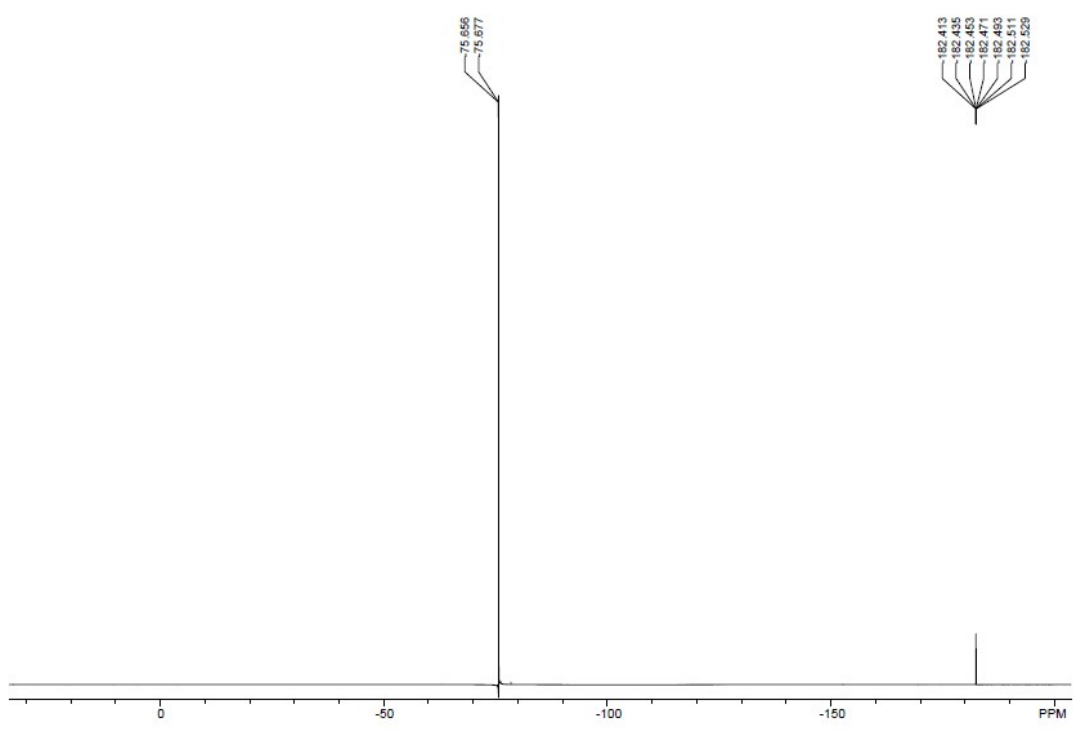

2s

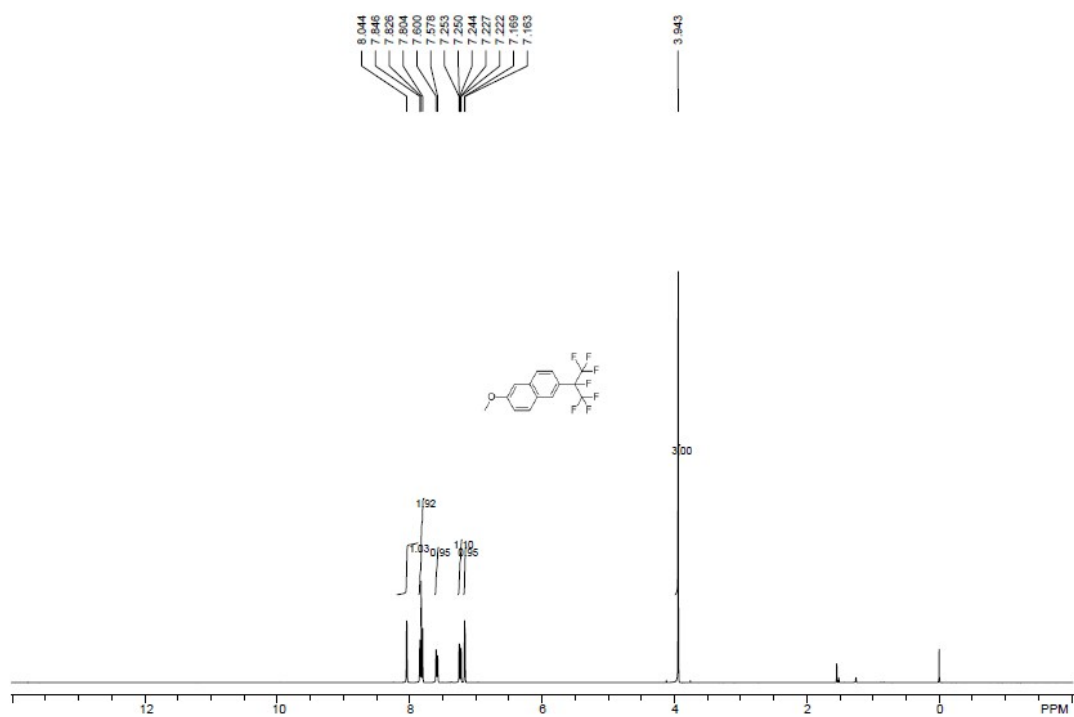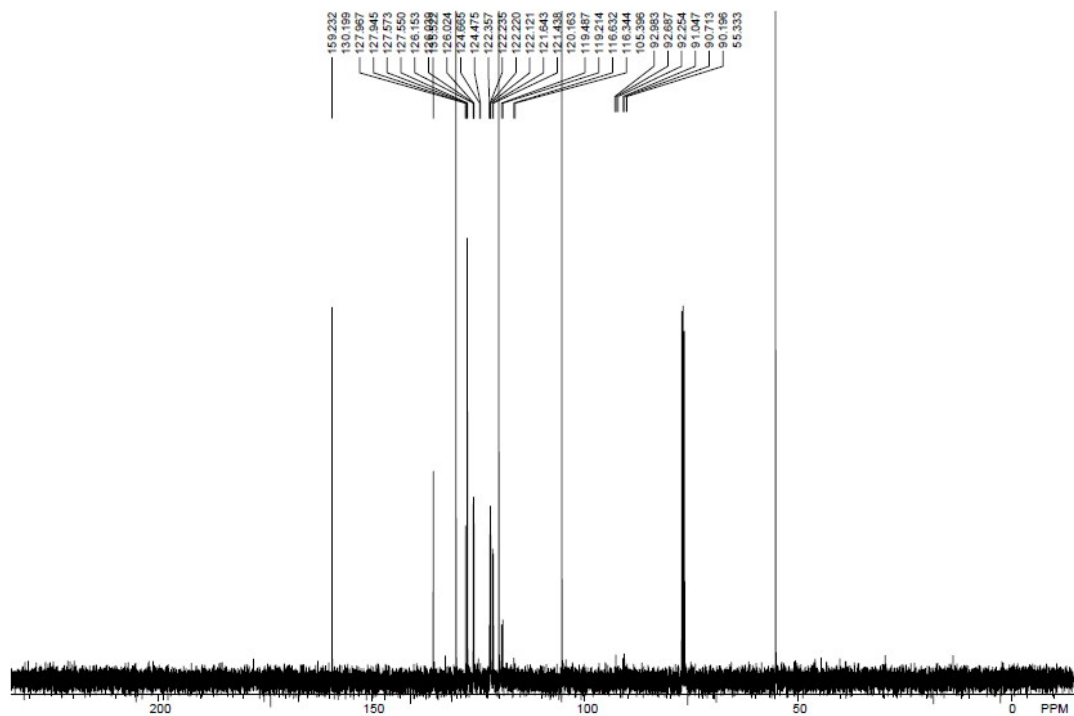

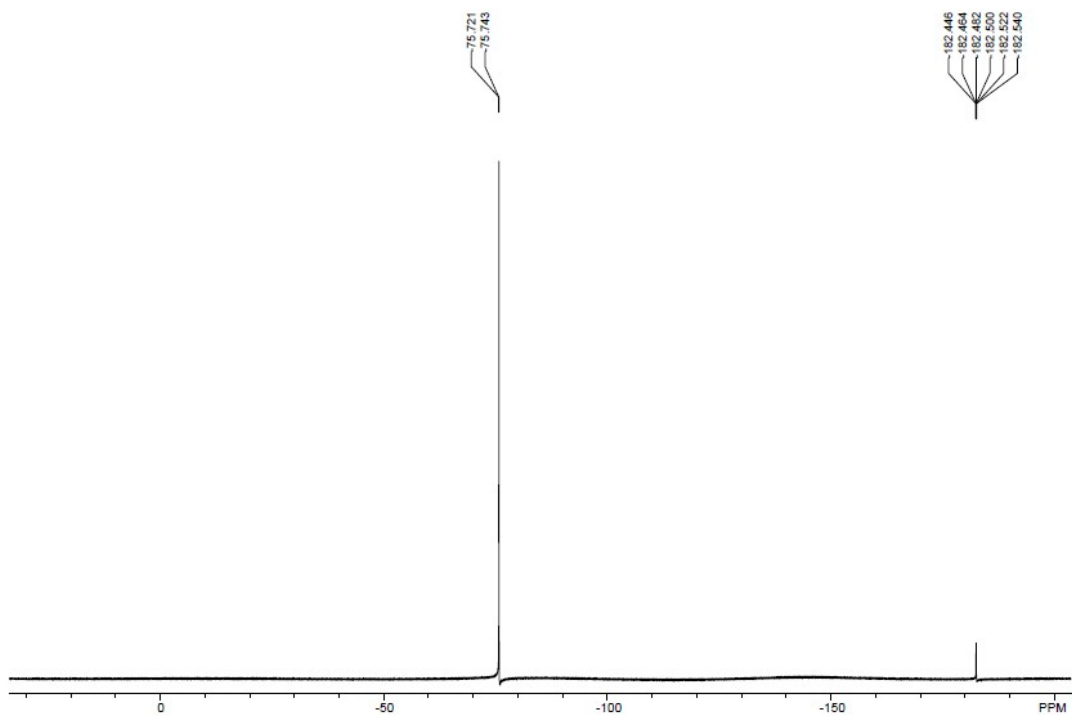

2u

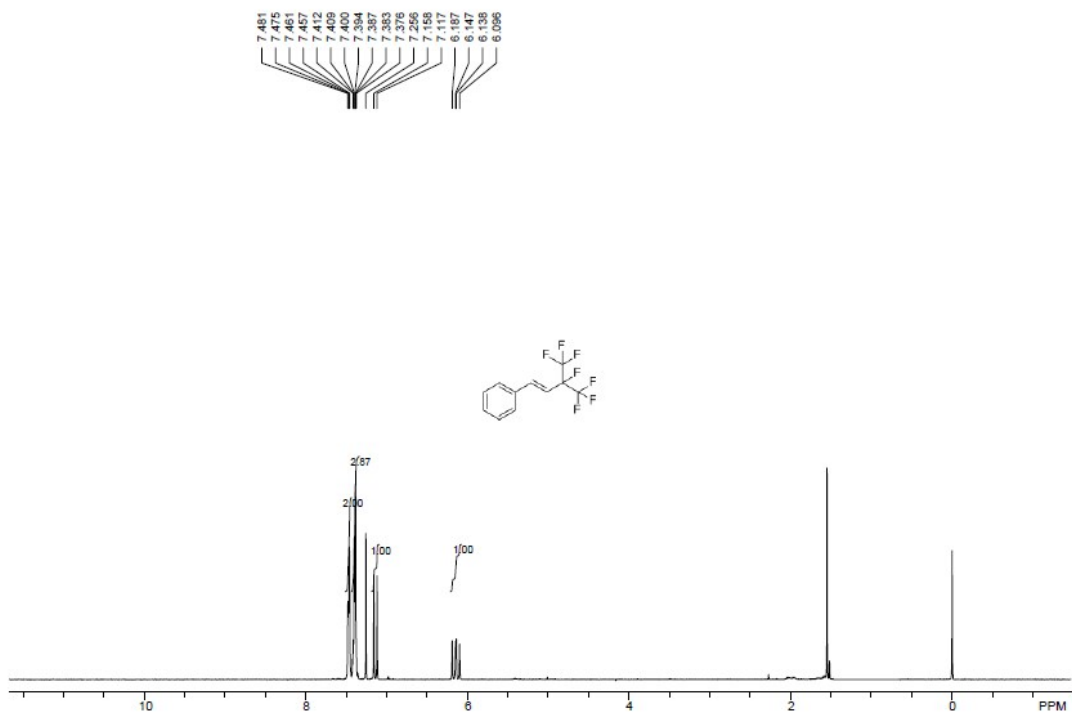

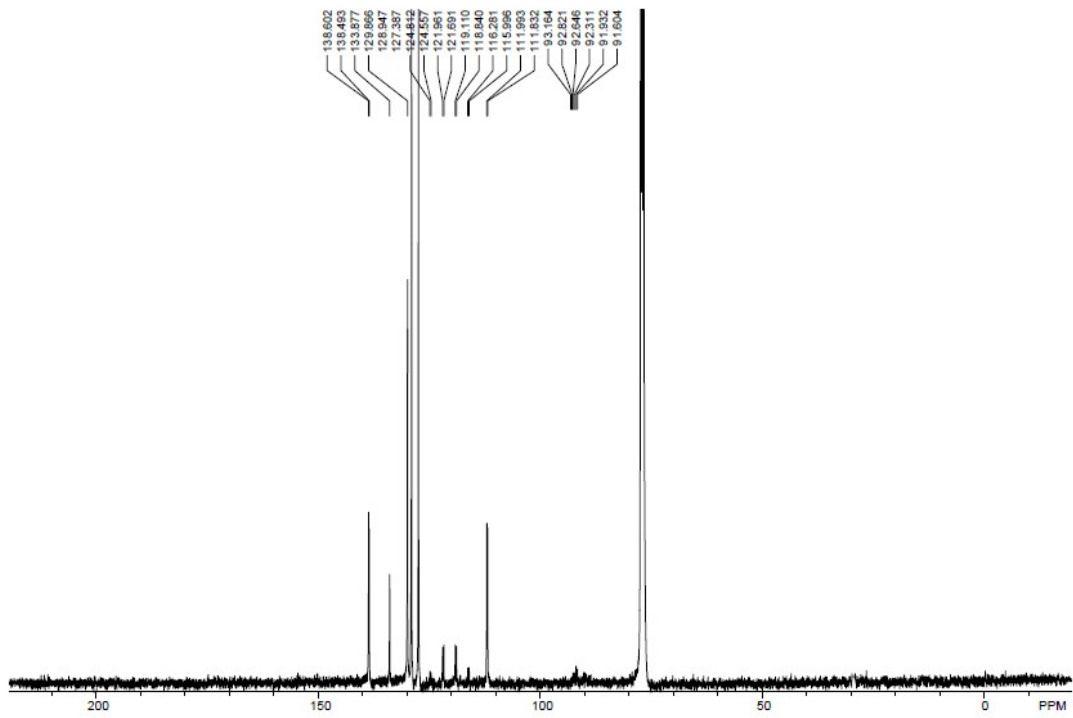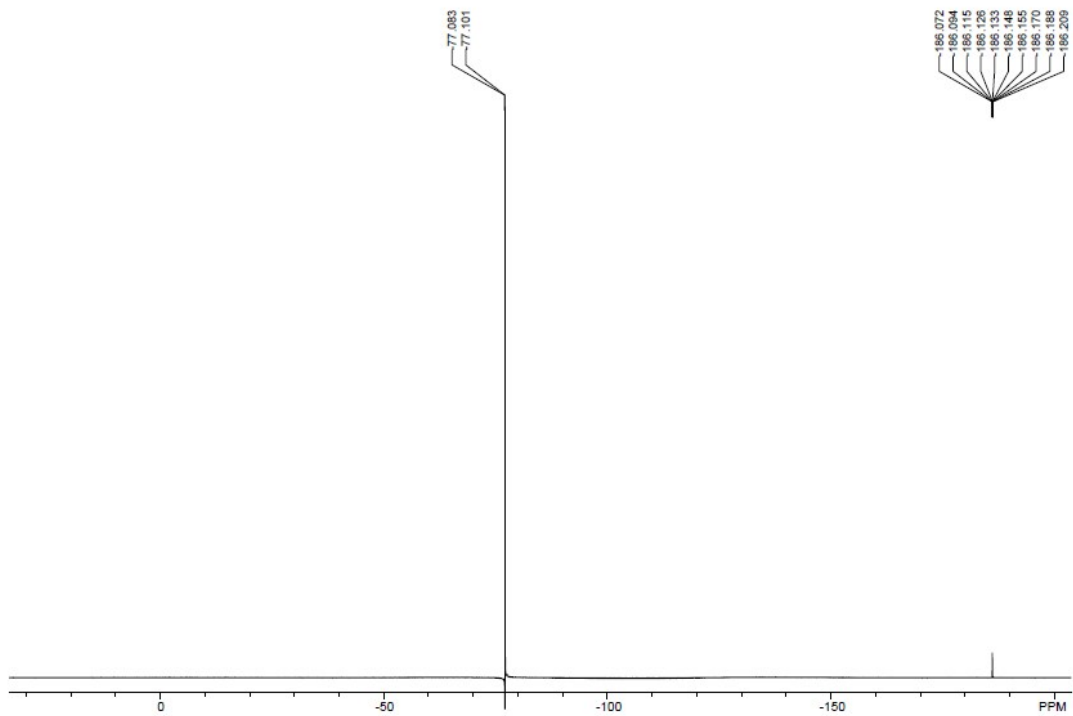

2v

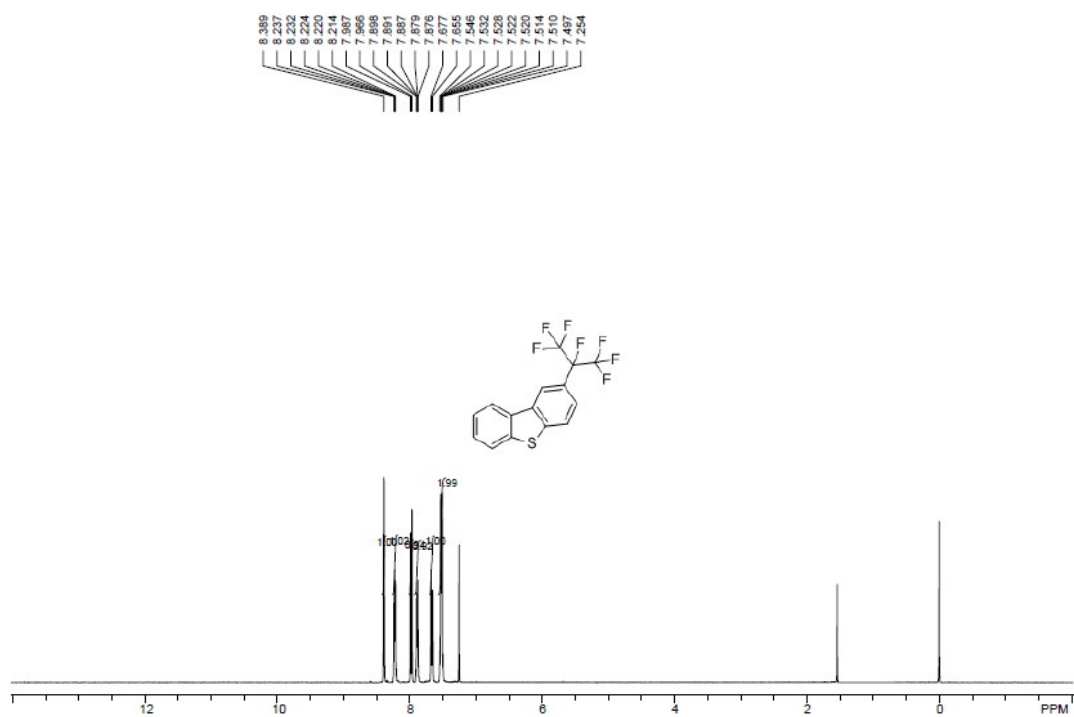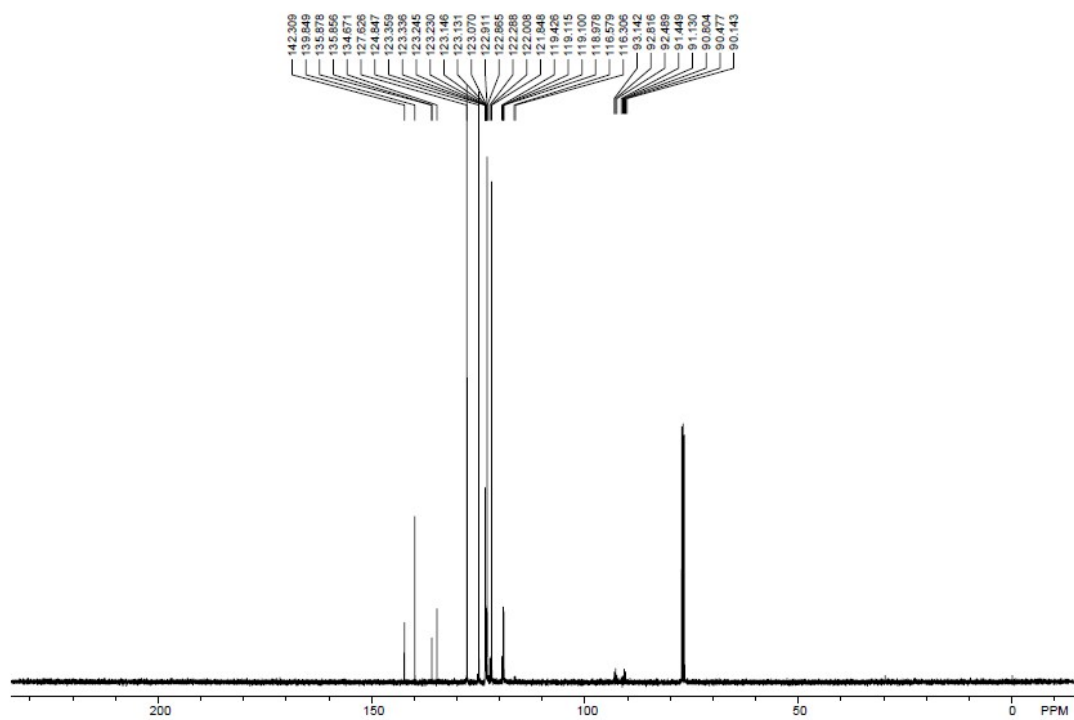

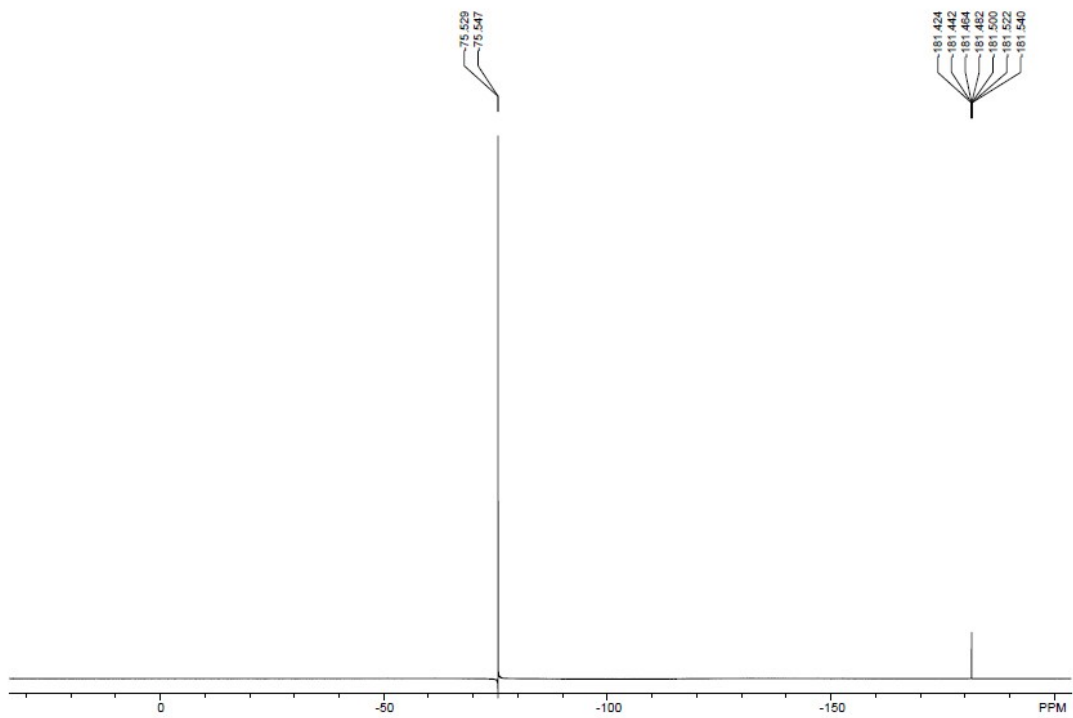

2w

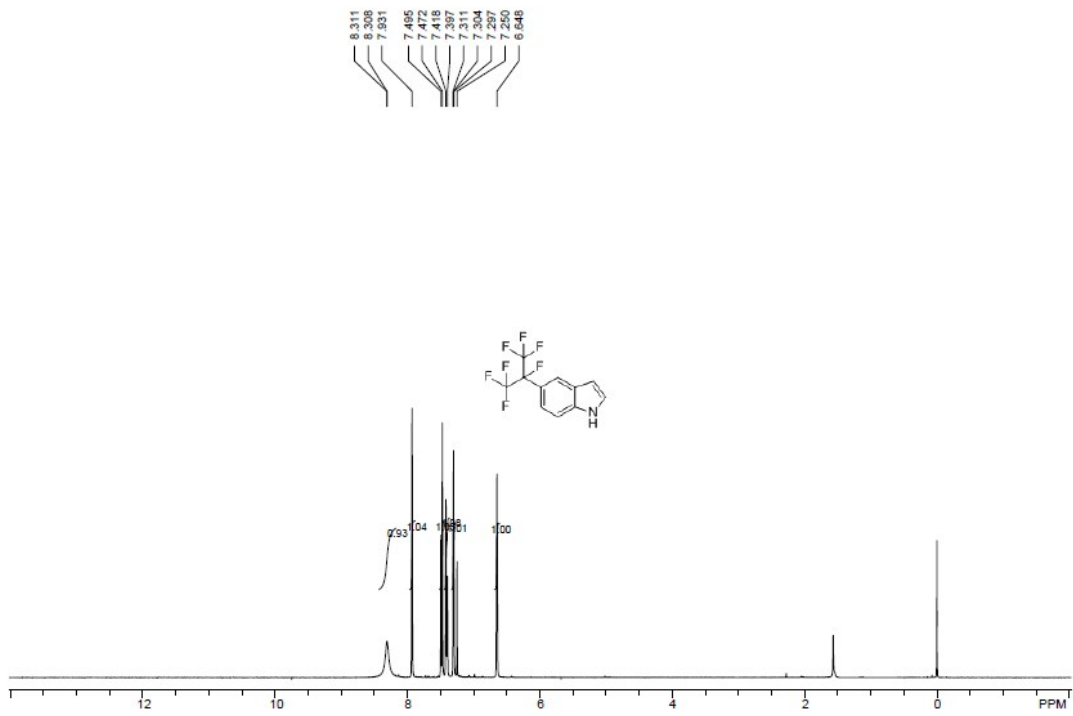

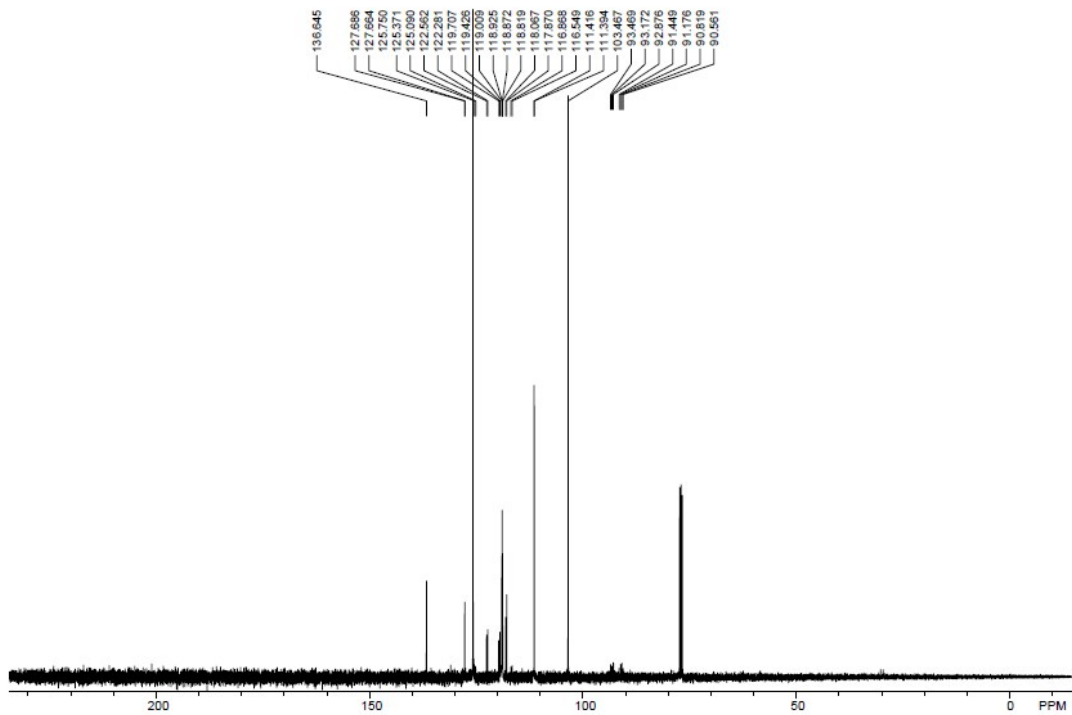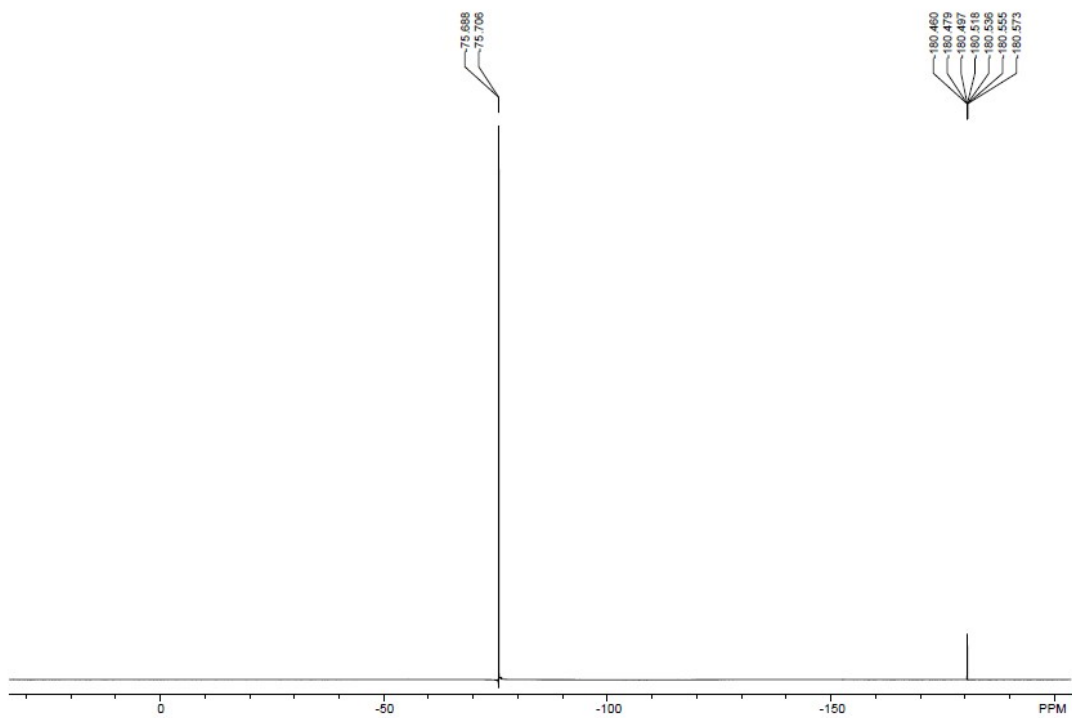



2x

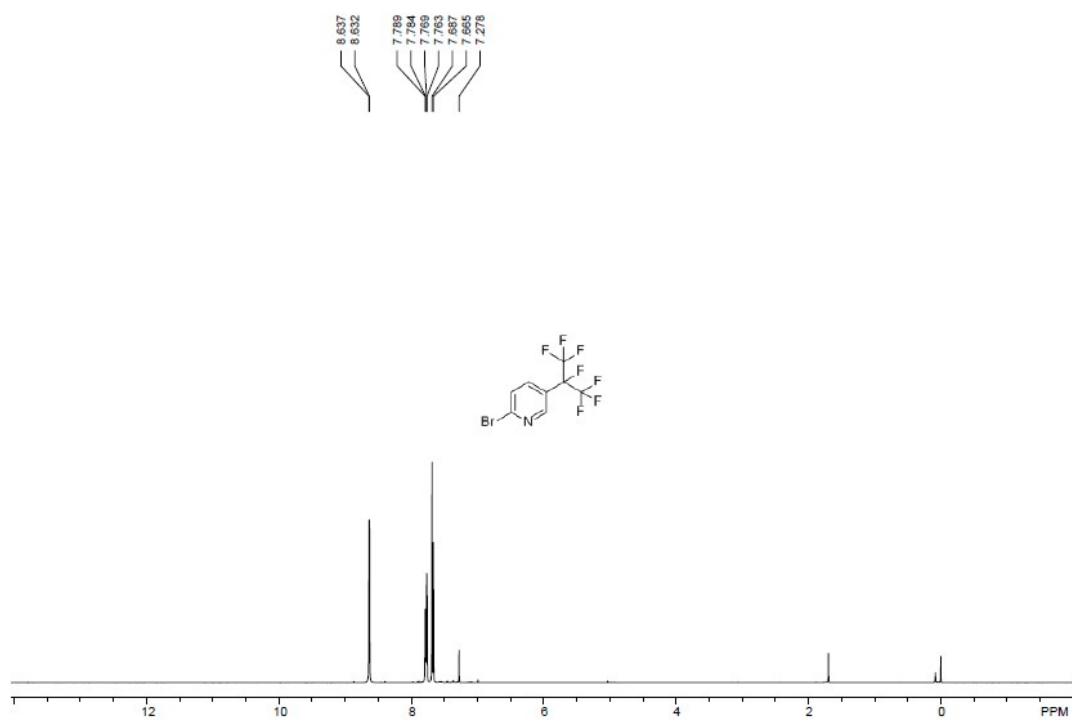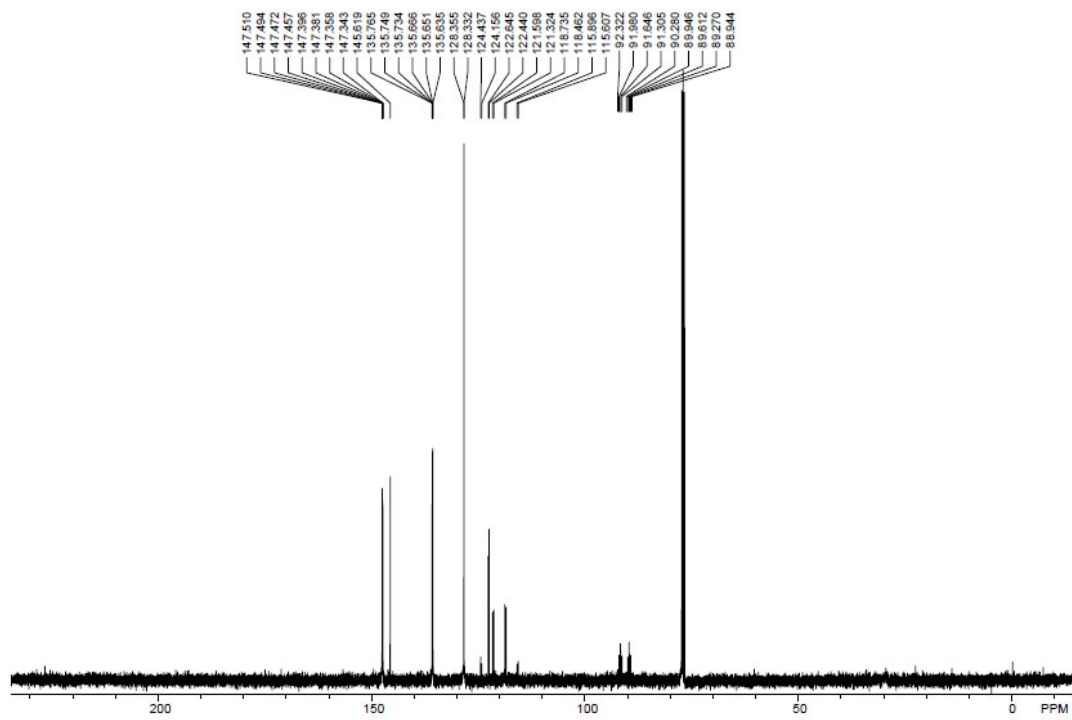

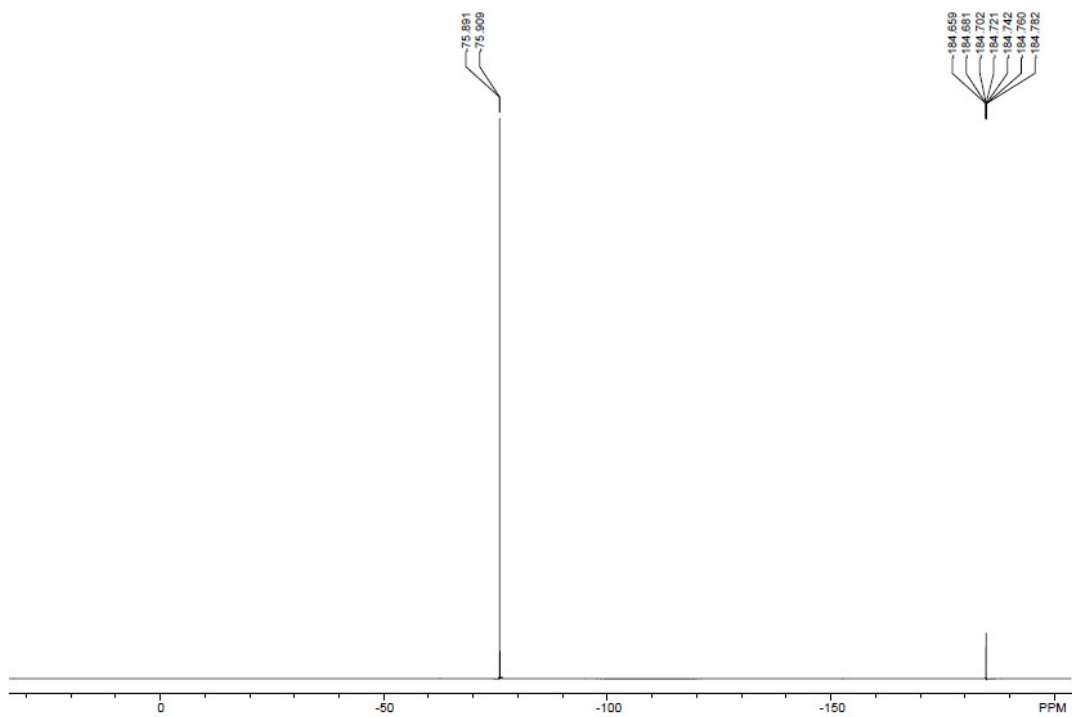

2y

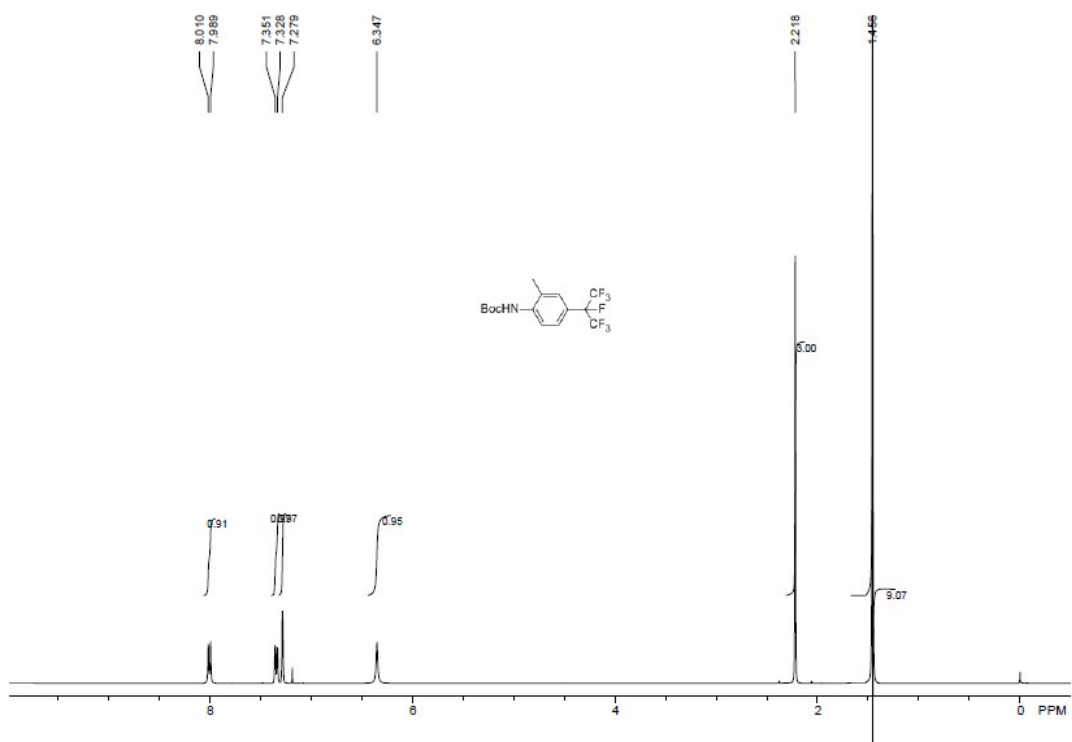



2z

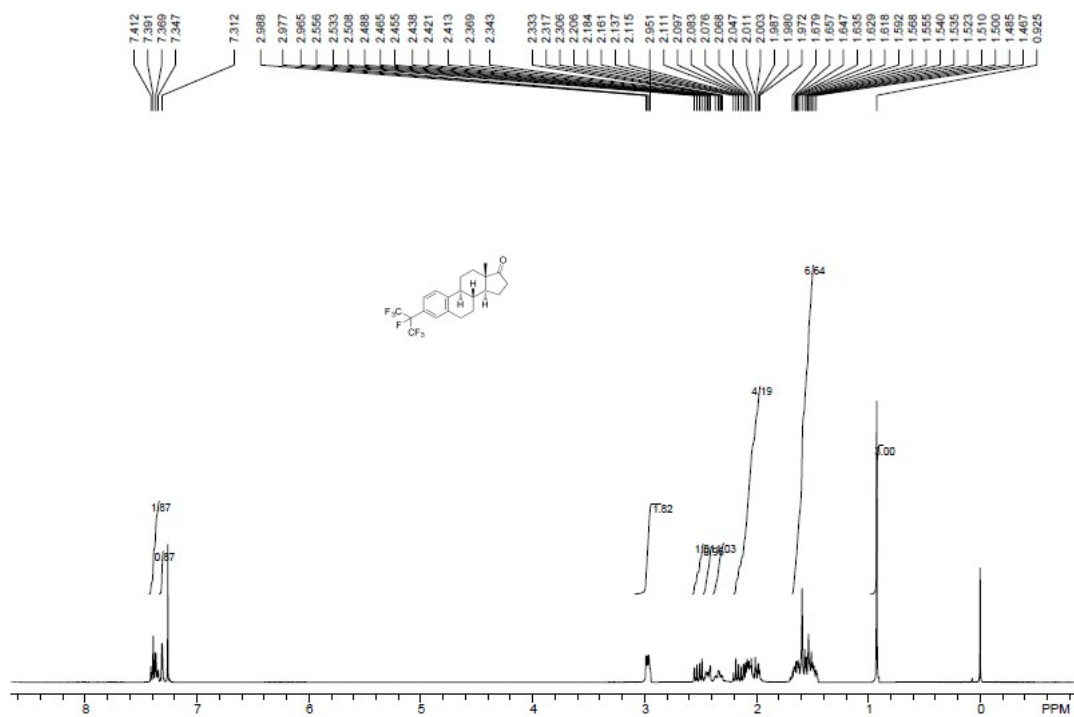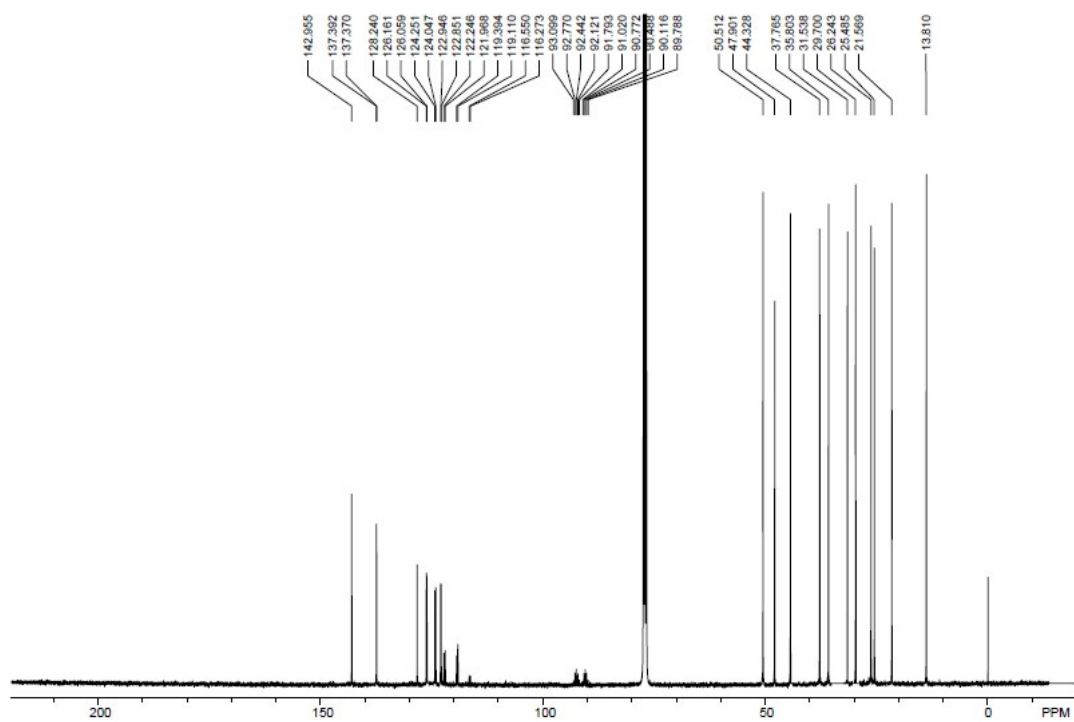

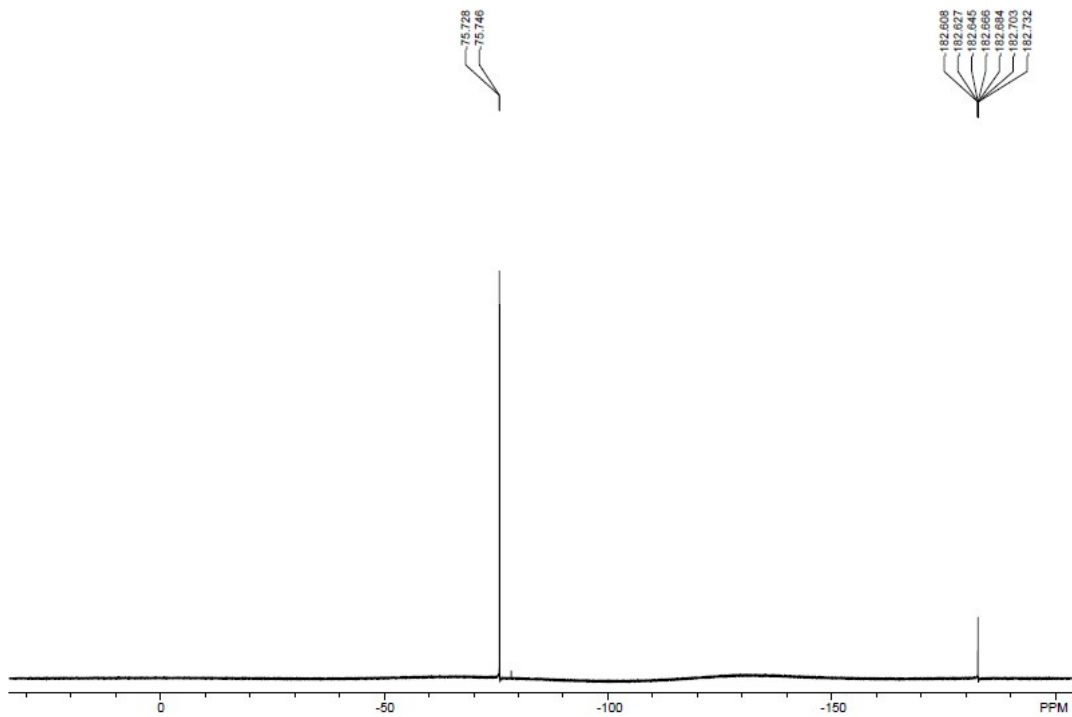

4

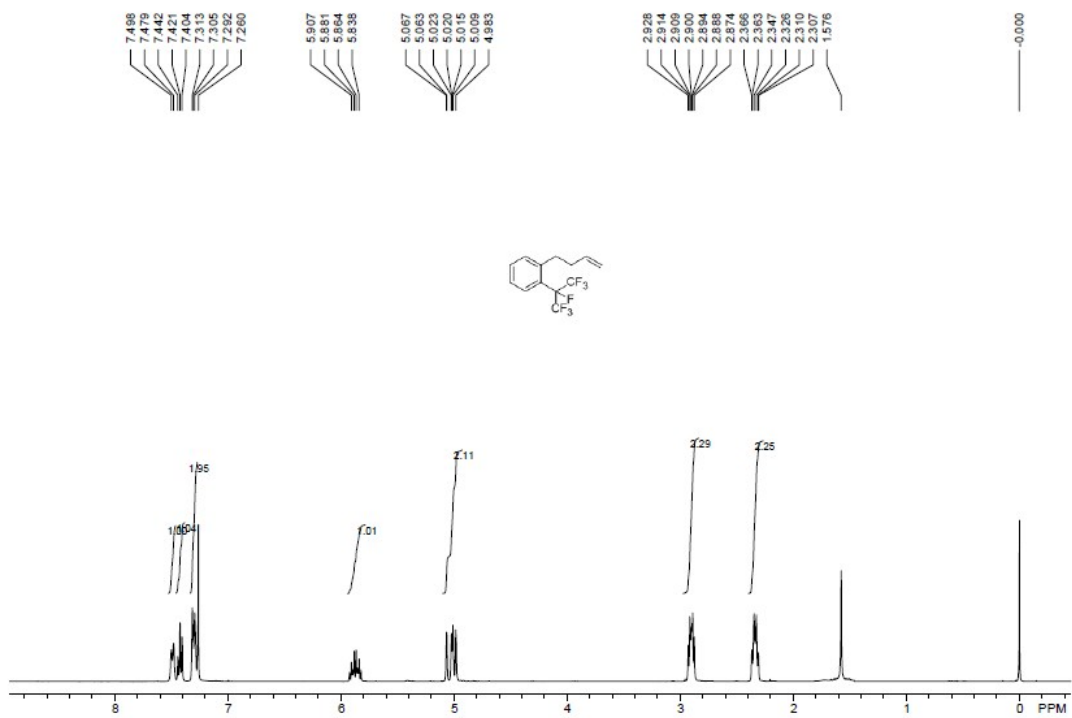

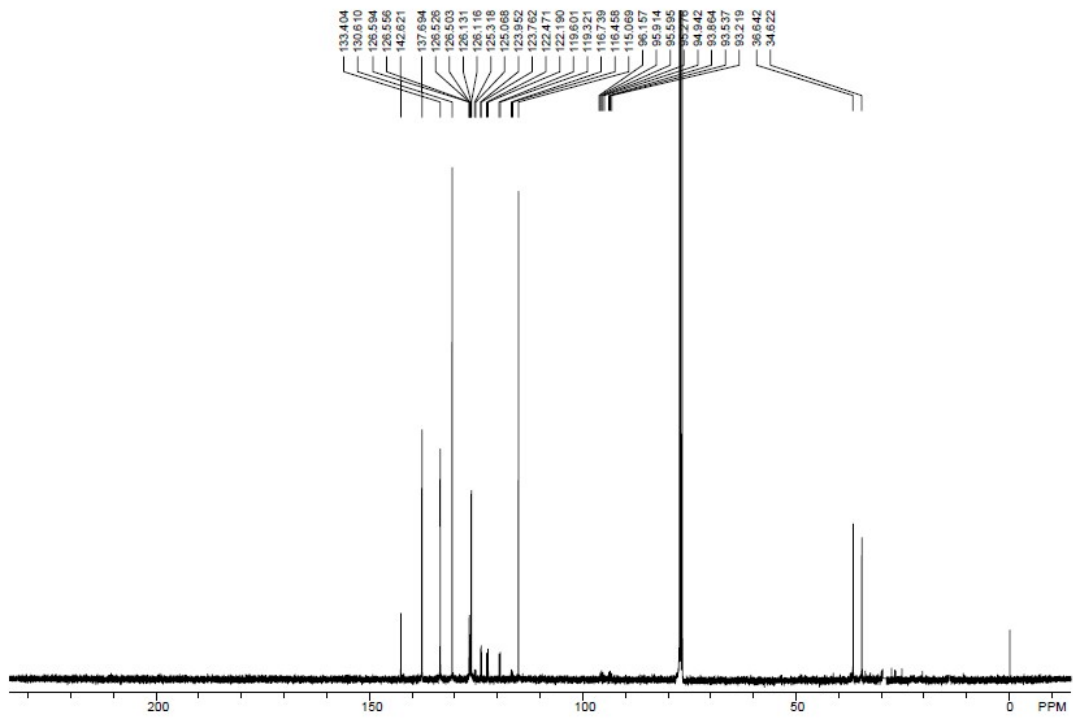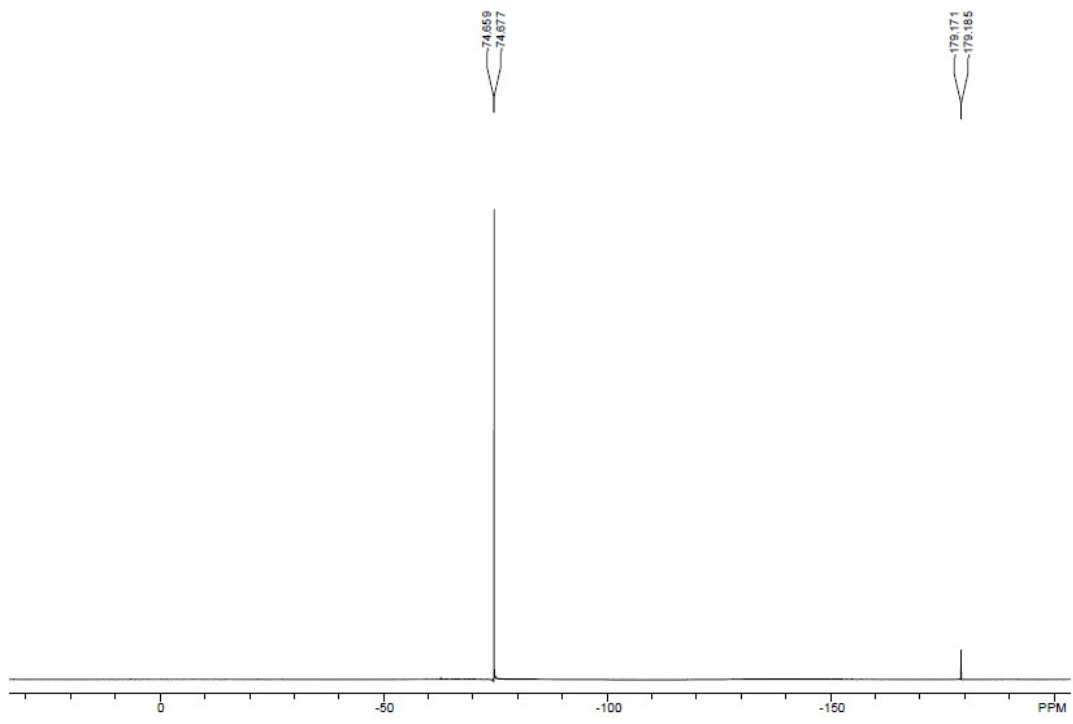

Supplement: c5cc07616a1.pdf [file c5cc07616a1.pdf]
